# Supplementary material for: Assessment of Oncology Advanced Practice Professional Willingness to Participate in Medical Aid in Dying
Source: JAMA Netw Open. 2022 Oct 26;5(10):e2239068. doi: 10.1001/jamanetworkopen.2022.39068 (PMC9606841; doi:10.1001/jamanetworkopen.2022.39068)
Supplement: Supplement. — eAppendix. Study Information Sheet and Research Electronic Data Capture Survey Data Dictionary [file jamanetwopen-e2239068-s001.pdf]

## Supplementary Online Content

Singer J, Daum C, Shen MJ, et al. Assessment of oncology advanced practice professional willingness to participate in medical aid in dying. *JAMA Netw Open*. 2022;5(10):e2239068. doi:10.1001/jamanetworkopen.2022.39068

**eAppendix.** Study Information Sheet and Research Electronic Data Capture Survey Data Dictionary

This supplementary material has been provided by the authors to give readers additional information about their work.

**eAppendix.** Study Information Sheet and Research Electronic Data Capture Survey Data Dictionary

The Study Information Sheet (SIS) includes information provided to research subjects prior to consenting to the survey. The Research Electronic Data Capture (REDCap) survey includes underlying branching logic so not every question was asked of all participants.

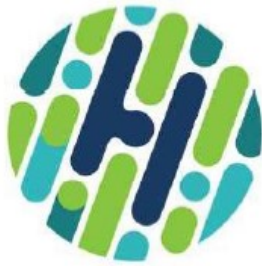

**FRED HUTCH**  
**CURES START HERE®**

Study Information Sheet

**Advance Practice Providers and Washington State's Death with Dignity Act**

Recently the Washington State legislature considered a bill that would have allowed Advance Practice Providers (APPs) to participate in Death with Dignity (DWD) as attending or consulting clinicians. This means that APPs would be able to prescribe a lethal dose of medication to adult patients with a terminal illness when that patient is expected to have a life expectancy of 6 months or less if the illness takes its usual course. As a result of this potential change in the law, we are interested in the perspectives of APPs on DWD.

This is a voluntary, on-line survey conducted via REDCap. You may elect to participate or opt-out. Your decision to opt-in or opt-out will not impact your employment or your relationship to your employer.

The survey should take 10-15 minutes to complete. You may skip any questions you prefer not to answer.

There are no costs or benefits to you if you participate. There is no payment for participation.

The risks of participation are primarily of breach of confidentiality. We will do everything we can to prevent this, including using study identifiers (e.g. instead of your name) and password-protected study files. While the biostatistician on this study will have access to identifiable data, researchers will only have access to de-identified data. Research results will only be presented in aggregate.

At the end of the survey you will be asked whether you are willing to be contacted in the future for additional studies.

**If you participate in the survey and later decide that you do not want your information included, please email:**

Elizabeth Loggers MD, PhD  
Associate Member, Clinical Research Division, Fred Hutch  
206.667.7442  
elloggers@fredhutch.org  
1100 Fairview Ave. N., Mail Stop D5-380  
Seattle, WA 98109

DWDxAPP  
v.1.0; 7Jun2021

FHCRC IRB Approval  
07/01/2021  
Document Released Date

1

## Data Dictionary Codebook

09/09/2022 10:30pm

| #                                                                                                                                                            | Variable / Field Name                                    | Field Label<br><i>Field Note</i>                                                                                                                                                                                                                                                                                                                                                                                                                                                                                                                                                                                                                                                                                                                                                                                                                                                                                                                                                                                                                                                                                                                                                                                                                                                                                                                                                                                                                                                                                                                                                                                                                                                                                                                                                                                                                                                                                                   | Field Attributes (Field Type, Validation, Choices, Calculations, etc.)                                                                                                      |
|--------------------------------------------------------------------------------------------------------------------------------------------------------------|----------------------------------------------------------|------------------------------------------------------------------------------------------------------------------------------------------------------------------------------------------------------------------------------------------------------------------------------------------------------------------------------------------------------------------------------------------------------------------------------------------------------------------------------------------------------------------------------------------------------------------------------------------------------------------------------------------------------------------------------------------------------------------------------------------------------------------------------------------------------------------------------------------------------------------------------------------------------------------------------------------------------------------------------------------------------------------------------------------------------------------------------------------------------------------------------------------------------------------------------------------------------------------------------------------------------------------------------------------------------------------------------------------------------------------------------------------------------------------------------------------------------------------------------------------------------------------------------------------------------------------------------------------------------------------------------------------------------------------------------------------------------------------------------------------------------------------------------------------------------------------------------------------------------------------------------------------------------------------------------------|-----------------------------------------------------------------------------------------------------------------------------------------------------------------------------|
| Instrument: <b>Information Sheet</b> (information_sheet) 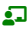 Enabled as survey |                                                          |                                                                                                                                                                                                                                                                                                                                                                                                                                                                                                                                                                                                                                                                                                                                                                                                                                                                                                                                                                                                                                                                                                                                                                                                                                                                                                                                                                                                                                                                                                                                                                                                                                                                                                                                                                                                                                                                                                                                    |                                                                                                                                                                             |
| 1                                                                                                                                                            | [record_id]                                              | Record ID                                                                                                                                                                                                                                                                                                                                                                                                                                                                                                                                                                                                                                                                                                                                                                                                                                                                                                                                                                                                                                                                                                                                                                                                                                                                                                                                                                                                                                                                                                                                                                                                                                                                                                                                                                                                                                                                                                                          | text<br><div> <input type="text"/><br/> <input type="text"/><br/> <input type="text"/><br/> <input type="text"/><br/> <input type="text"/> </div> Field Annotation: @HIDDEN |
| 2                                                                                                                                                            | [informationsheet]                                       | Section Header: <i>Advance Practice Providers and Washington State's Death with Dignity Act</i><br><br>Recently the Washington State legislature considered a bill that would have allowed Advance Practice Providers (APPs) to participate in Death with Dignity (DWD) as attending or consulting clinicians. This means that APPs would be able to prescribe a lethal dose of medication to adult patients with a terminal illness when that patient is expected to have a life expectancy of 6 months or less if the illness takes its usual course. As a result of this potential change in the law, we are interested in the perspectives of APPs on DWD. This is a voluntary, on-line survey conducted via REDCap. You may elect to participate or opt-out. Your decision to opt-in or opt-out will not impact your employment or your relationship to your employer. The survey should take 10-15 minutes to complete. You may skip any questions you prefer not to answer. There are no costs or benefits to you if you participate. There is no payment for participation. The risks of participation are primarily of breach of confidentiality. We will do everything we can to prevent this, including using study identifiers (e.g. instead of your name) and password-protected study files. While the biostatistician on this study will have access to identifiable data, researchers will only have access to de-identified data. Research results will only be presented in aggregate. At the end of the survey you will be asked whether you are willing to be contacted in the future for additional studies. If you participate in the survey and later decide that you do not want your information included, please email: Elizabeth Loggers MD, PhD Associate Member, Clinical Research Division, Fred Hutch 206.667.7442 eloggers@fredhutch.org 1100 Fairview Ave. N., Mail Stop D5-380 Seattle, WA 98109 | descriptive                                                                                                                                                                 |
| 3                                                                                                                                                            | [optinout]                                               | By opting-in, you acknowledge you've read the study information sheet and are willing to participate in this 10-15 minute survey. Please opt-in or opt-out of this research study                                                                                                                                                                                                                                                                                                                                                                                                                                                                                                                                                                                                                                                                                                                                                                                                                                                                                                                                                                                                                                                                                                                                                                                                                                                                                                                                                                                                                                                                                                                                                                                                                                                                                                                                                  | radio, Required<br><div> <input type="radio"/> 1 Opt-in<br/> <input type="radio"/> 2 Opt-out           </div>                                                               |
| 4                                                                                                                                                            | [yes]<br><br>Show the field ONLY if:<br>[optinout] = '1' | You've decided to opt-in to taking the survey. Thank you! Please click submit to continue on to the survey.                                                                                                                                                                                                                                                                                                                                                                                                                                                                                                                                                                                                                                                                                                                                                                                                                                                                                                                                                                                                                                                                                                                                                                                                                                                                                                                                                                                                                                                                                                                                                                                                                                                                                                                                                                                                                        | descriptive                                                                                                                                                                 |
| 5                                                                                                                                                            | [no]<br><br>Show the field ONLY if:<br>[optinout] = '2'  | You've decided to opt-out of the survey, and we will no longer contact you. If you change your mind, please contact Dr. Elizabeth Loggers (eloggers@fredhutch.org). Thank you for your time!                                                                                                                                                                                                                                                                                                                                                                                                                                                                                                                                                                                                                                                                                                                                                                                                                                                                                                                                                                                                                                                                                                                                                                                                                                                                                                                                                                                                                                                                                                                                                                                                                                                                                                                                       | descriptive                                                                                                                                                                 |

|                                                                                                                                                    |                                                                              |                                                                                                                      |                                                                                                                                                                                                                                                                                                                                                                                                                                                                                                                                                                                                                                     |   |             |                                  |            |             |          |   |             |                           |   |             |                    |   |             |                                     |   |             |                                                        |    |             |          |    |             |                       |    |              |      |    |              |       |
|----------------------------------------------------------------------------------------------------------------------------------------------------|------------------------------------------------------------------------------|----------------------------------------------------------------------------------------------------------------------|-------------------------------------------------------------------------------------------------------------------------------------------------------------------------------------------------------------------------------------------------------------------------------------------------------------------------------------------------------------------------------------------------------------------------------------------------------------------------------------------------------------------------------------------------------------------------------------------------------------------------------------|---|-------------|----------------------------------|------------|-------------|----------|---|-------------|---------------------------|---|-------------|--------------------|---|-------------|-------------------------------------|---|-------------|--------------------------------------------------------|----|-------------|----------|----|-------------|-----------------------|----|--------------|------|----|--------------|-------|
| 6                                                                                                                                                  | [ <b>information_sheet_complete</b> ]                                        | Section Header: <i>Form Status</i><br>Complete?                                                                      | dropdown <table border="1"> <tr><td>0</td><td>Incomplete</td></tr> <tr><td>1</td><td>Unverified</td></tr> <tr><td>2</td><td>Complete</td></tr> </table>                                                                                                                                                                                                                                                                                                                                                                                                                                                                             | 0 | Incomplete  | 1                                | Unverified | 2           | Complete |   |             |                           |   |             |                    |   |             |                                     |   |             |                                                        |    |             |          |    |             |                       |    |              |      |    |              |       |
| 0                                                                                                                                                  | Incomplete                                                                   |                                                                                                                      |                                                                                                                                                                                                                                                                                                                                                                                                                                                                                                                                                                                                                                     |   |             |                                  |            |             |          |   |             |                           |   |             |                    |   |             |                                     |   |             |                                                        |    |             |          |    |             |                       |    |              |      |    |              |       |
| 1                                                                                                                                                  | Unverified                                                                   |                                                                                                                      |                                                                                                                                                                                                                                                                                                                                                                                                                                                                                                                                                                                                                                     |   |             |                                  |            |             |          |   |             |                           |   |             |                    |   |             |                                     |   |             |                                                        |    |             |          |    |             |                       |    |              |      |    |              |       |
| 2                                                                                                                                                  | Complete                                                                     |                                                                                                                      |                                                                                                                                                                                                                                                                                                                                                                                                                                                                                                                                                                                                                                     |   |             |                                  |            |             |          |   |             |                           |   |             |                    |   |             |                                     |   |             |                                                        |    |             |          |    |             |                       |    |              |      |    |              |       |
| Instrument: <b>Demographics</b> (demographics) 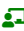 Enabled as survey |                                                                              |                                                                                                                      |                                                                                                                                                                                                                                                                                                                                                                                                                                                                                                                                                                                                                                     |   |             |                                  |            |             |          |   |             |                           |   |             |                    |   |             |                                     |   |             |                                                        |    |             |          |    |             |                       |    |              |      |    |              |       |
| 7                                                                                                                                                  | [ <b>age</b> ]                                                               | Section Header: <i>Demographics</i><br>What is your age in years?                                                    | text (number), Identifier                                                                                                                                                                                                                                                                                                                                                                                                                                                                                                                                                                                                           |   |             |                                  |            |             |          |   |             |                           |   |             |                    |   |             |                                     |   |             |                                                        |    |             |          |    |             |                       |    |              |      |    |              |       |
| 8                                                                                                                                                  | [ <b>gender</b> ]                                                            | Which term(s) best express(es) your gender identity (that you wish to disclose)? Please select as many as applicable | checkbox <table border="1"> <tr><td>1</td><td>gender__1</td><td>Man</td></tr> <tr><td>2</td><td>gender__2</td><td>Woman</td></tr> <tr><td>3</td><td>gender__3</td><td>Genderfluid/Non-binary</td></tr> <tr><td>4</td><td>gender__4</td><td>Transgender</td></tr> <tr><td>5</td><td>gender__5</td><td>Prefer not to answer</td></tr> <tr><td>6</td><td>gender__6</td><td>None or some of the above, I'd like to describe myself</td></tr> </table>                                                                                                                                                                                   | 1 | gender__1   | Man                              | 2          | gender__2   | Woman    | 3 | gender__3   | Genderfluid/Non-binary    | 4 | gender__4   | Transgender        | 5 | gender__5   | Prefer not to answer                | 6 | gender__6   | None or some of the above, I'd like to describe myself |    |             |          |    |             |                       |    |              |      |    |              |       |
| 1                                                                                                                                                  | gender__1                                                                    | Man                                                                                                                  |                                                                                                                                                                                                                                                                                                                                                                                                                                                                                                                                                                                                                                     |   |             |                                  |            |             |          |   |             |                           |   |             |                    |   |             |                                     |   |             |                                                        |    |             |          |    |             |                       |    |              |      |    |              |       |
| 2                                                                                                                                                  | gender__2                                                                    | Woman                                                                                                                |                                                                                                                                                                                                                                                                                                                                                                                                                                                                                                                                                                                                                                     |   |             |                                  |            |             |          |   |             |                           |   |             |                    |   |             |                                     |   |             |                                                        |    |             |          |    |             |                       |    |              |      |    |              |       |
| 3                                                                                                                                                  | gender__3                                                                    | Genderfluid/Non-binary                                                                                               |                                                                                                                                                                                                                                                                                                                                                                                                                                                                                                                                                                                                                                     |   |             |                                  |            |             |          |   |             |                           |   |             |                    |   |             |                                     |   |             |                                                        |    |             |          |    |             |                       |    |              |      |    |              |       |
| 4                                                                                                                                                  | gender__4                                                                    | Transgender                                                                                                          |                                                                                                                                                                                                                                                                                                                                                                                                                                                                                                                                                                                                                                     |   |             |                                  |            |             |          |   |             |                           |   |             |                    |   |             |                                     |   |             |                                                        |    |             |          |    |             |                       |    |              |      |    |              |       |
| 5                                                                                                                                                  | gender__5                                                                    | Prefer not to answer                                                                                                 |                                                                                                                                                                                                                                                                                                                                                                                                                                                                                                                                                                                                                                     |   |             |                                  |            |             |          |   |             |                           |   |             |                    |   |             |                                     |   |             |                                                        |    |             |          |    |             |                       |    |              |      |    |              |       |
| 6                                                                                                                                                  | gender__6                                                                    | None or some of the above, I'd like to describe myself                                                               |                                                                                                                                                                                                                                                                                                                                                                                                                                                                                                                                                                                                                                     |   |             |                                  |            |             |          |   |             |                           |   |             |                    |   |             |                                     |   |             |                                                        |    |             |          |    |             |                       |    |              |      |    |              |       |
| 9                                                                                                                                                  | [ <b>gender_other</b> ]<br>Show the field ONLY if:<br>[gender(6)] = "1"      | How would you best describe your gender expression?                                                                  | text                                                                                                                                                                                                                                                                                                                                                                                                                                                                                                                                                                                                                                |   |             |                                  |            |             |          |   |             |                           |   |             |                    |   |             |                                     |   |             |                                                        |    |             |          |    |             |                       |    |              |      |    |              |       |
| 10                                                                                                                                                 | [ <b>race</b> ]                                                              | What is your race/ethnicity? Please select as many as applicable                                                     | checkbox <table border="1"> <tr><td>1</td><td>race__1</td><td>American Indian or Alaska Native</td></tr> <tr><td>2</td><td>race__2</td><td>Asian</td></tr> <tr><td>3</td><td>race__3</td><td>Black or African American</td></tr> <tr><td>4</td><td>race__4</td><td>Hispanic or Latinx</td></tr> <tr><td>5</td><td>race__5</td><td>Native Hawaiian or Pacific Islander</td></tr> <tr><td>6</td><td>race__6</td><td>White</td></tr> <tr><td>88</td><td>race__88</td><td>Other</td></tr> <tr><td>99</td><td>race__99</td><td>Prefer not to answer</td></tr> </table>                                                                   | 1 | race__1     | American Indian or Alaska Native | 2          | race__2     | Asian    | 3 | race__3     | Black or African American | 4 | race__4     | Hispanic or Latinx | 5 | race__5     | Native Hawaiian or Pacific Islander | 6 | race__6     | White                                                  | 88 | race__88    | Other    | 99 | race__99    | Prefer not to answer  |    |              |      |    |              |       |
| 1                                                                                                                                                  | race__1                                                                      | American Indian or Alaska Native                                                                                     |                                                                                                                                                                                                                                                                                                                                                                                                                                                                                                                                                                                                                                     |   |             |                                  |            |             |          |   |             |                           |   |             |                    |   |             |                                     |   |             |                                                        |    |             |          |    |             |                       |    |              |      |    |              |       |
| 2                                                                                                                                                  | race__2                                                                      | Asian                                                                                                                |                                                                                                                                                                                                                                                                                                                                                                                                                                                                                                                                                                                                                                     |   |             |                                  |            |             |          |   |             |                           |   |             |                    |   |             |                                     |   |             |                                                        |    |             |          |    |             |                       |    |              |      |    |              |       |
| 3                                                                                                                                                  | race__3                                                                      | Black or African American                                                                                            |                                                                                                                                                                                                                                                                                                                                                                                                                                                                                                                                                                                                                                     |   |             |                                  |            |             |          |   |             |                           |   |             |                    |   |             |                                     |   |             |                                                        |    |             |          |    |             |                       |    |              |      |    |              |       |
| 4                                                                                                                                                  | race__4                                                                      | Hispanic or Latinx                                                                                                   |                                                                                                                                                                                                                                                                                                                                                                                                                                                                                                                                                                                                                                     |   |             |                                  |            |             |          |   |             |                           |   |             |                    |   |             |                                     |   |             |                                                        |    |             |          |    |             |                       |    |              |      |    |              |       |
| 5                                                                                                                                                  | race__5                                                                      | Native Hawaiian or Pacific Islander                                                                                  |                                                                                                                                                                                                                                                                                                                                                                                                                                                                                                                                                                                                                                     |   |             |                                  |            |             |          |   |             |                           |   |             |                    |   |             |                                     |   |             |                                                        |    |             |          |    |             |                       |    |              |      |    |              |       |
| 6                                                                                                                                                  | race__6                                                                      | White                                                                                                                |                                                                                                                                                                                                                                                                                                                                                                                                                                                                                                                                                                                                                                     |   |             |                                  |            |             |          |   |             |                           |   |             |                    |   |             |                                     |   |             |                                                        |    |             |          |    |             |                       |    |              |      |    |              |       |
| 88                                                                                                                                                 | race__88                                                                     | Other                                                                                                                |                                                                                                                                                                                                                                                                                                                                                                                                                                                                                                                                                                                                                                     |   |             |                                  |            |             |          |   |             |                           |   |             |                    |   |             |                                     |   |             |                                                        |    |             |          |    |             |                       |    |              |      |    |              |       |
| 99                                                                                                                                                 | race__99                                                                     | Prefer not to answer                                                                                                 |                                                                                                                                                                                                                                                                                                                                                                                                                                                                                                                                                                                                                                     |   |             |                                  |            |             |          |   |             |                           |   |             |                    |   |             |                                     |   |             |                                                        |    |             |          |    |             |                       |    |              |      |    |              |       |
| 11                                                                                                                                                 | [ <b>race_other_1</b> ]<br>Show the field ONLY if:<br>[race(88)]='1'         | If other, please describe your racial background                                                                     | text                                                                                                                                                                                                                                                                                                                                                                                                                                                                                                                                                                                                                                |   |             |                                  |            |             |          |   |             |                           |   |             |                    |   |             |                                     |   |             |                                                        |    |             |          |    |             |                       |    |              |      |    |              |       |
| 12                                                                                                                                                 | [ <b>english</b> ]                                                           | Do you speak, read, or write in a language(s) other than English?                                                    | yesno <table border="1"> <tr><td>1</td><td>Yes</td></tr> <tr><td>0</td><td>No</td></tr> </table>                                                                                                                                                                                                                                                                                                                                                                                                                                                                                                                                    | 1 | Yes         | 0                                | No         |             |          |   |             |                           |   |             |                    |   |             |                                     |   |             |                                                        |    |             |          |    |             |                       |    |              |      |    |              |       |
| 1                                                                                                                                                  | Yes                                                                          |                                                                                                                      |                                                                                                                                                                                                                                                                                                                                                                                                                                                                                                                                                                                                                                     |   |             |                                  |            |             |          |   |             |                           |   |             |                    |   |             |                                     |   |             |                                                        |    |             |          |    |             |                       |    |              |      |    |              |       |
| 0                                                                                                                                                  | No                                                                           |                                                                                                                      |                                                                                                                                                                                                                                                                                                                                                                                                                                                                                                                                                                                                                                     |   |             |                                  |            |             |          |   |             |                           |   |             |                    |   |             |                                     |   |             |                                                        |    |             |          |    |             |                       |    |              |      |    |              |       |
| 13                                                                                                                                                 | [ <b>english_other</b> ]<br>Show the field ONLY if:<br>[english]='1'         | What other language(s) do you speak, read, or write in? Please list as many as applicable                            | text                                                                                                                                                                                                                                                                                                                                                                                                                                                                                                                                                                                                                                |   |             |                                  |            |             |          |   |             |                           |   |             |                    |   |             |                                     |   |             |                                                        |    |             |          |    |             |                       |    |              |      |    |              |       |
| 14                                                                                                                                                 | [ <b>religion</b> ]                                                          | With which of the following do you identify as: Please select as many as applicable                                  | checkbox <table border="1"> <tr><td>1</td><td>religion__1</td><td>Christian</td></tr> <tr><td>2</td><td>religion__2</td><td>Muslim</td></tr> <tr><td>3</td><td>religion__3</td><td>Buddhist</td></tr> <tr><td>4</td><td>religion__4</td><td>Hindu</td></tr> <tr><td>5</td><td>religion__5</td><td>Jewish</td></tr> <tr><td>6</td><td>religion__6</td><td>Spiritual</td></tr> <tr><td>7</td><td>religion__7</td><td>Agnostic</td></tr> <tr><td>8</td><td>religion__8</td><td>Atheist/Non-religious</td></tr> <tr><td>88</td><td>religion__88</td><td>None</td></tr> <tr><td>99</td><td>religion__99</td><td>Other</td></tr> </table> | 1 | religion__1 | Christian                        | 2          | religion__2 | Muslim   | 3 | religion__3 | Buddhist                  | 4 | religion__4 | Hindu              | 5 | religion__5 | Jewish                              | 6 | religion__6 | Spiritual                                              | 7  | religion__7 | Agnostic | 8  | religion__8 | Atheist/Non-religious | 88 | religion__88 | None | 99 | religion__99 | Other |
| 1                                                                                                                                                  | religion__1                                                                  | Christian                                                                                                            |                                                                                                                                                                                                                                                                                                                                                                                                                                                                                                                                                                                                                                     |   |             |                                  |            |             |          |   |             |                           |   |             |                    |   |             |                                     |   |             |                                                        |    |             |          |    |             |                       |    |              |      |    |              |       |
| 2                                                                                                                                                  | religion__2                                                                  | Muslim                                                                                                               |                                                                                                                                                                                                                                                                                                                                                                                                                                                                                                                                                                                                                                     |   |             |                                  |            |             |          |   |             |                           |   |             |                    |   |             |                                     |   |             |                                                        |    |             |          |    |             |                       |    |              |      |    |              |       |
| 3                                                                                                                                                  | religion__3                                                                  | Buddhist                                                                                                             |                                                                                                                                                                                                                                                                                                                                                                                                                                                                                                                                                                                                                                     |   |             |                                  |            |             |          |   |             |                           |   |             |                    |   |             |                                     |   |             |                                                        |    |             |          |    |             |                       |    |              |      |    |              |       |
| 4                                                                                                                                                  | religion__4                                                                  | Hindu                                                                                                                |                                                                                                                                                                                                                                                                                                                                                                                                                                                                                                                                                                                                                                     |   |             |                                  |            |             |          |   |             |                           |   |             |                    |   |             |                                     |   |             |                                                        |    |             |          |    |             |                       |    |              |      |    |              |       |
| 5                                                                                                                                                  | religion__5                                                                  | Jewish                                                                                                               |                                                                                                                                                                                                                                                                                                                                                                                                                                                                                                                                                                                                                                     |   |             |                                  |            |             |          |   |             |                           |   |             |                    |   |             |                                     |   |             |                                                        |    |             |          |    |             |                       |    |              |      |    |              |       |
| 6                                                                                                                                                  | religion__6                                                                  | Spiritual                                                                                                            |                                                                                                                                                                                                                                                                                                                                                                                                                                                                                                                                                                                                                                     |   |             |                                  |            |             |          |   |             |                           |   |             |                    |   |             |                                     |   |             |                                                        |    |             |          |    |             |                       |    |              |      |    |              |       |
| 7                                                                                                                                                  | religion__7                                                                  | Agnostic                                                                                                             |                                                                                                                                                                                                                                                                                                                                                                                                                                                                                                                                                                                                                                     |   |             |                                  |            |             |          |   |             |                           |   |             |                    |   |             |                                     |   |             |                                                        |    |             |          |    |             |                       |    |              |      |    |              |       |
| 8                                                                                                                                                  | religion__8                                                                  | Atheist/Non-religious                                                                                                |                                                                                                                                                                                                                                                                                                                                                                                                                                                                                                                                                                                                                                     |   |             |                                  |            |             |          |   |             |                           |   |             |                    |   |             |                                     |   |             |                                                        |    |             |          |    |             |                       |    |              |      |    |              |       |
| 88                                                                                                                                                 | religion__88                                                                 | None                                                                                                                 |                                                                                                                                                                                                                                                                                                                                                                                                                                                                                                                                                                                                                                     |   |             |                                  |            |             |          |   |             |                           |   |             |                    |   |             |                                     |   |             |                                                        |    |             |          |    |             |                       |    |              |      |    |              |       |
| 99                                                                                                                                                 | religion__99                                                                 | Other                                                                                                                |                                                                                                                                                                                                                                                                                                                                                                                                                                                                                                                                                                                                                                     |   |             |                                  |            |             |          |   |             |                           |   |             |                    |   |             |                                     |   |             |                                                        |    |             |          |    |             |                       |    |              |      |    |              |       |
| 15                                                                                                                                                 | [ <b>religion_other</b> ]<br>Show the field ONLY if:<br>[religion(99)] = '1' | If you selected 'other', please specify here:                                                                        | text                                                                                                                                                                                                                                                                                                                                                                                                                                                                                                                                                                                                                                |   |             |                                  |            |             |          |   |             |                           |   |             |                    |   |             |                                     |   |             |                                                        |    |             |          |    |             |                       |    |              |      |    |              |       |

|    |                                                                                                                                                                                                                                          |                                                                                                                    |                                                                                                                                                                                                                                                                             |   |                              |           |                              |                 |                                 |    |                              |       |                 |   |       |
|----|------------------------------------------------------------------------------------------------------------------------------------------------------------------------------------------------------------------------------------------|--------------------------------------------------------------------------------------------------------------------|-----------------------------------------------------------------------------------------------------------------------------------------------------------------------------------------------------------------------------------------------------------------------------|---|------------------------------|-----------|------------------------------|-----------------|---------------------------------|----|------------------------------|-------|-----------------|---|-------|
| 16 | [religion_identify]                                                                                                                                                                                                                      | Which of the following most accurately reflects your spirituality?                                                 | radio<br><table border="1"> <tr><td>1</td><td>Religious, but not spiritual</td></tr> <tr><td>2</td><td>Spiritual, but not religious</td></tr> <tr><td>3</td><td>Neither spiritual nor religious</td></tr> <tr><td>4</td><td>Both spiritual and religious</td></tr> </table> | 1 | Religious, but not spiritual | 2         | Spiritual, but not religious | 3               | Neither spiritual nor religious | 4  | Both spiritual and religious |       |                 |   |       |
| 1  | Religious, but not spiritual                                                                                                                                                                                                             |                                                                                                                    |                                                                                                                                                                                                                                                                             |   |                              |           |                              |                 |                                 |    |                              |       |                 |   |       |
| 2  | Spiritual, but not religious                                                                                                                                                                                                             |                                                                                                                    |                                                                                                                                                                                                                                                                             |   |                              |           |                              |                 |                                 |    |                              |       |                 |   |       |
| 3  | Neither spiritual nor religious                                                                                                                                                                                                          |                                                                                                                    |                                                                                                                                                                                                                                                                             |   |                              |           |                              |                 |                                 |    |                              |       |                 |   |       |
| 4  | Both spiritual and religious                                                                                                                                                                                                             |                                                                                                                    |                                                                                                                                                                                                                                                                             |   |                              |           |                              |                 |                                 |    |                              |       |                 |   |       |
| 17 | [religion_frequency]<br>Show the field ONLY if:<br>[religion(1)] = '1' OR [religion(2)] = '1' OR [religion(3)] = '1' OR [religion(4)] = '1' OR [religion(5)] = '1' OR [religion(6)] = '1' OR [religion(7)] = '1' OR [religion(99)] = '1' | How often do you engage in religious or spiritual activities (as you define them)?                                 | radio<br><table border="1"> <tr><td>0</td><td>Not at all</td></tr> <tr><td>1</td><td>Rarely</td></tr> <tr><td>2</td><td>Yearly</td></tr> <tr><td>3</td><td>Monthly</td></tr> <tr><td>4</td><td>Weekly</td></tr> <tr><td>5</td><td>Daily</td></tr> </table>                  | 0 | Not at all                   | 1         | Rarely                       | 2               | Yearly                          | 3  | Monthly                      | 4     | Weekly          | 5 | Daily |
| 0  | Not at all                                                                                                                                                                                                                               |                                                                                                                    |                                                                                                                                                                                                                                                                             |   |                              |           |                              |                 |                                 |    |                              |       |                 |   |       |
| 1  | Rarely                                                                                                                                                                                                                                   |                                                                                                                    |                                                                                                                                                                                                                                                                             |   |                              |           |                              |                 |                                 |    |                              |       |                 |   |       |
| 2  | Yearly                                                                                                                                                                                                                                   |                                                                                                                    |                                                                                                                                                                                                                                                                             |   |                              |           |                              |                 |                                 |    |                              |       |                 |   |       |
| 3  | Monthly                                                                                                                                                                                                                                  |                                                                                                                    |                                                                                                                                                                                                                                                                             |   |                              |           |                              |                 |                                 |    |                              |       |                 |   |       |
| 4  | Weekly                                                                                                                                                                                                                                   |                                                                                                                    |                                                                                                                                                                                                                                                                             |   |                              |           |                              |                 |                                 |    |                              |       |                 |   |       |
| 5  | Daily                                                                                                                                                                                                                                    |                                                                                                                    |                                                                                                                                                                                                                                                                             |   |                              |           |                              |                 |                                 |    |                              |       |                 |   |       |
| 18 | [political_interest]                                                                                                                                                                                                                     | How interested are you in politics, government, and public affairs?                                                | radio<br><table border="1"> <tr><td>1</td><td>Not at all interested</td></tr> <tr><td>2</td><td>Slightly interested</td></tr> <tr><td>3</td><td>Somewhat interested</td></tr> <tr><td>4</td><td>Interested</td></tr> <tr><td>5</td><td>Very interested</td></tr> </table>   | 1 | Not at all interested        | 2         | Slightly interested          | 3               | Somewhat interested             | 4  | Interested                   | 5     | Very interested |   |       |
| 1  | Not at all interested                                                                                                                                                                                                                    |                                                                                                                    |                                                                                                                                                                                                                                                                             |   |                              |           |                              |                 |                                 |    |                              |       |                 |   |       |
| 2  | Slightly interested                                                                                                                                                                                                                      |                                                                                                                    |                                                                                                                                                                                                                                                                             |   |                              |           |                              |                 |                                 |    |                              |       |                 |   |       |
| 3  | Somewhat interested                                                                                                                                                                                                                      |                                                                                                                    |                                                                                                                                                                                                                                                                             |   |                              |           |                              |                 |                                 |    |                              |       |                 |   |       |
| 4  | Interested                                                                                                                                                                                                                               |                                                                                                                    |                                                                                                                                                                                                                                                                             |   |                              |           |                              |                 |                                 |    |                              |       |                 |   |       |
| 5  | Very interested                                                                                                                                                                                                                          |                                                                                                                    |                                                                                                                                                                                                                                                                             |   |                              |           |                              |                 |                                 |    |                              |       |                 |   |       |
| 19 | [role]                                                                                                                                                                                                                                   | Section Header: <i>Education/Professional Experience</i><br>What is your role? Please select as many as applicable | checkbox<br><table border="1"> <tr><td>1</td><td>role__1</td><td>PA-C</td></tr> <tr><td>2</td><td>role__2</td><td>ARNP</td></tr> <tr><td>88</td><td>role__88</td><td>Other</td></tr> </table>                                                                               | 1 | role__1                      | PA-C      | 2                            | role__2         | ARNP                            | 88 | role__88                     | Other |                 |   |       |
| 1  | role__1                                                                                                                                                                                                                                  | PA-C                                                                                                               |                                                                                                                                                                                                                                                                             |   |                              |           |                              |                 |                                 |    |                              |       |                 |   |       |
| 2  | role__2                                                                                                                                                                                                                                  | ARNP                                                                                                               |                                                                                                                                                                                                                                                                             |   |                              |           |                              |                 |                                 |    |                              |       |                 |   |       |
| 88 | role__88                                                                                                                                                                                                                                 | Other                                                                                                              |                                                                                                                                                                                                                                                                             |   |                              |           |                              |                 |                                 |    |                              |       |                 |   |       |
| 20 | [role_other]<br>Show the field ONLY if:<br>[role(88)] = '1'                                                                                                                                                                              | If your role is not listed above, please specify here:                                                             | text                                                                                                                                                                                                                                                                        |   |                              |           |                              |                 |                                 |    |                              |       |                 |   |       |
| 21 | [years_practice]                                                                                                                                                                                                                         | How many years have you been practicing as an APP?                                                                 | radio<br><table border="1"> <tr><td>1</td><td>0-2 years</td></tr> <tr><td>2</td><td>3-5 years</td></tr> <tr><td>3</td><td>6-10 years</td></tr> <tr><td>4</td><td>11-20 years</td></tr> <tr><td>5</td><td>&gt;20 years</td></tr> </table>                                    | 1 | 0-2 years                    | 2         | 3-5 years                    | 3               | 6-10 years                      | 4  | 11-20 years                  | 5     | >20 years       |   |       |
| 1  | 0-2 years                                                                                                                                                                                                                                |                                                                                                                    |                                                                                                                                                                                                                                                                             |   |                              |           |                              |                 |                                 |    |                              |       |                 |   |       |
| 2  | 3-5 years                                                                                                                                                                                                                                |                                                                                                                    |                                                                                                                                                                                                                                                                             |   |                              |           |                              |                 |                                 |    |                              |       |                 |   |       |
| 3  | 6-10 years                                                                                                                                                                                                                               |                                                                                                                    |                                                                                                                                                                                                                                                                             |   |                              |           |                              |                 |                                 |    |                              |       |                 |   |       |
| 4  | 11-20 years                                                                                                                                                                                                                              |                                                                                                                    |                                                                                                                                                                                                                                                                             |   |                              |           |                              |                 |                                 |    |                              |       |                 |   |       |
| 5  | >20 years                                                                                                                                                                                                                                |                                                                                                                    |                                                                                                                                                                                                                                                                             |   |                              |           |                              |                 |                                 |    |                              |       |                 |   |       |
| 22 | [years_practice_2]                                                                                                                                                                                                                       | How many years have you been practicing as an APP in Washington State?                                             | radio<br><table border="1"> <tr><td>1</td><td>0-2 years</td></tr> <tr><td>2</td><td>3-5 years</td></tr> <tr><td>3</td><td>6-10 years</td></tr> <tr><td>4</td><td>11-20 years</td></tr> <tr><td>5</td><td>&gt;20 years</td></tr> </table>                                    | 1 | 0-2 years                    | 2         | 3-5 years                    | 3               | 6-10 years                      | 4  | 11-20 years                  | 5     | >20 years       |   |       |
| 1  | 0-2 years                                                                                                                                                                                                                                |                                                                                                                    |                                                                                                                                                                                                                                                                             |   |                              |           |                              |                 |                                 |    |                              |       |                 |   |       |
| 2  | 3-5 years                                                                                                                                                                                                                                |                                                                                                                    |                                                                                                                                                                                                                                                                             |   |                              |           |                              |                 |                                 |    |                              |       |                 |   |       |
| 3  | 6-10 years                                                                                                                                                                                                                               |                                                                                                                    |                                                                                                                                                                                                                                                                             |   |                              |           |                              |                 |                                 |    |                              |       |                 |   |       |
| 4  | 11-20 years                                                                                                                                                                                                                              |                                                                                                                    |                                                                                                                                                                                                                                                                             |   |                              |           |                              |                 |                                 |    |                              |       |                 |   |       |
| 5  | >20 years                                                                                                                                                                                                                                |                                                                                                                    |                                                                                                                                                                                                                                                                             |   |                              |           |                              |                 |                                 |    |                              |       |                 |   |       |
| 23 | [years_practice_3]                                                                                                                                                                                                                       | How many years have you been practicing as an APP in Oncology?                                                     | radio<br><table border="1"> <tr><td>1</td><td>0-2 years</td></tr> <tr><td>2</td><td>3-5 years</td></tr> <tr><td>3</td><td>6-10 years</td></tr> <tr><td>4</td><td>11-20 years</td></tr> <tr><td>5</td><td>&gt;20 years</td></tr> </table>                                    | 1 | 0-2 years                    | 2         | 3-5 years                    | 3               | 6-10 years                      | 4  | 11-20 years                  | 5     | >20 years       |   |       |
| 1  | 0-2 years                                                                                                                                                                                                                                |                                                                                                                    |                                                                                                                                                                                                                                                                             |   |                              |           |                              |                 |                                 |    |                              |       |                 |   |       |
| 2  | 3-5 years                                                                                                                                                                                                                                |                                                                                                                    |                                                                                                                                                                                                                                                                             |   |                              |           |                              |                 |                                 |    |                              |       |                 |   |       |
| 3  | 6-10 years                                                                                                                                                                                                                               |                                                                                                                    |                                                                                                                                                                                                                                                                             |   |                              |           |                              |                 |                                 |    |                              |       |                 |   |       |
| 4  | 11-20 years                                                                                                                                                                                                                              |                                                                                                                    |                                                                                                                                                                                                                                                                             |   |                              |           |                              |                 |                                 |    |                              |       |                 |   |       |
| 5  | >20 years                                                                                                                                                                                                                                |                                                                                                                    |                                                                                                                                                                                                                                                                             |   |                              |           |                              |                 |                                 |    |                              |       |                 |   |       |
| 24 | [practicetype]                                                                                                                                                                                                                           | Where you do currently practice as an APP? Please select as many as applicable                                     | checkbox<br><table border="1"> <tr><td>1</td><td>practicetype__1</td><td>Inpatient</td></tr> <tr><td>2</td><td>practicetype__2</td><td>Outpatient</td></tr> </table>                                                                                                        | 1 | practicetype__1              | Inpatient | 2                            | practicetype__2 | Outpatient                      |    |                              |       |                 |   |       |
| 1  | practicetype__1                                                                                                                                                                                                                          | Inpatient                                                                                                          |                                                                                                                                                                                                                                                                             |   |                              |           |                              |                 |                                 |    |                              |       |                 |   |       |
| 2  | practicetype__2                                                                                                                                                                                                                          | Outpatient                                                                                                         |                                                                                                                                                                                                                                                                             |   |                              |           |                              |                 |                                 |    |                              |       |                 |   |       |

|                                                                                                                                                      |                                                                                              |                                                                                                                    |                                                                                                                                                                                                                                                                                                                                                                                     |   |                                 |   |                                       |   |               |   |                  |   |                    |   |                   |   |                 |    |       |
|------------------------------------------------------------------------------------------------------------------------------------------------------|----------------------------------------------------------------------------------------------|--------------------------------------------------------------------------------------------------------------------|-------------------------------------------------------------------------------------------------------------------------------------------------------------------------------------------------------------------------------------------------------------------------------------------------------------------------------------------------------------------------------------|---|---------------------------------|---|---------------------------------------|---|---------------|---|------------------|---|--------------------|---|-------------------|---|-----------------|----|-------|
| 25                                                                                                                                                   | [ field ]                                                                                    | What field do you currently practice in?                                                                           | radio <table><tr><td>1</td><td>Hematology/Malignant Hematology</td></tr><tr><td>2</td><td>Transplant</td></tr><tr><td>3</td><td>Immunotherapy</td></tr><tr><td>4</td><td>Medical Oncology</td></tr><tr><td>5</td><td>Radiation Oncology</td></tr><tr><td>6</td><td>Surgical Oncology</td></tr><tr><td>7</td><td>Supportive Care</td></tr><tr><td>99</td><td>Other</td></tr></table> | 1 | Hematology/Malignant Hematology | 2 | Transplant                            | 3 | Immunotherapy | 4 | Medical Oncology | 5 | Radiation Oncology | 6 | Surgical Oncology | 7 | Supportive Care | 99 | Other |
| 1                                                                                                                                                    | Hematology/Malignant Hematology                                                              |                                                                                                                    |                                                                                                                                                                                                                                                                                                                                                                                     |   |                                 |   |                                       |   |               |   |                  |   |                    |   |                   |   |                 |    |       |
| 2                                                                                                                                                    | Transplant                                                                                   |                                                                                                                    |                                                                                                                                                                                                                                                                                                                                                                                     |   |                                 |   |                                       |   |               |   |                  |   |                    |   |                   |   |                 |    |       |
| 3                                                                                                                                                    | Immunotherapy                                                                                |                                                                                                                    |                                                                                                                                                                                                                                                                                                                                                                                     |   |                                 |   |                                       |   |               |   |                  |   |                    |   |                   |   |                 |    |       |
| 4                                                                                                                                                    | Medical Oncology                                                                             |                                                                                                                    |                                                                                                                                                                                                                                                                                                                                                                                     |   |                                 |   |                                       |   |               |   |                  |   |                    |   |                   |   |                 |    |       |
| 5                                                                                                                                                    | Radiation Oncology                                                                           |                                                                                                                    |                                                                                                                                                                                                                                                                                                                                                                                     |   |                                 |   |                                       |   |               |   |                  |   |                    |   |                   |   |                 |    |       |
| 6                                                                                                                                                    | Surgical Oncology                                                                            |                                                                                                                    |                                                                                                                                                                                                                                                                                                                                                                                     |   |                                 |   |                                       |   |               |   |                  |   |                    |   |                   |   |                 |    |       |
| 7                                                                                                                                                    | Supportive Care                                                                              |                                                                                                                    |                                                                                                                                                                                                                                                                                                                                                                                     |   |                                 |   |                                       |   |               |   |                  |   |                    |   |                   |   |                 |    |       |
| 99                                                                                                                                                   | Other                                                                                        |                                                                                                                    |                                                                                                                                                                                                                                                                                                                                                                                     |   |                                 |   |                                       |   |               |   |                  |   |                    |   |                   |   |                 |    |       |
| 26                                                                                                                                                   | [ field_other ]<br>Show the field ONLY if:<br>[field] = '99'                                 | If you practice in another field, please specify here:                                                             | text                                                                                                                                                                                                                                                                                                                                                                                |   |                                 |   |                                       |   |               |   |                  |   |                    |   |                   |   |                 |    |       |
| 27                                                                                                                                                   | [ demographics_complete ]                                                                    | Section Header: <i>Form Status</i><br>Complete?                                                                    | dropdown <table><tr><td>0</td><td>Incomplete</td></tr><tr><td>1</td><td>Unverified</td></tr><tr><td>2</td><td>Complete</td></tr></table>                                                                                                                                                                                                                                            | 0 | Incomplete                      | 1 | Unverified                            | 2 | Complete      |   |                  |   |                    |   |                   |   |                 |    |       |
| 0                                                                                                                                                    | Incomplete                                                                                   |                                                                                                                    |                                                                                                                                                                                                                                                                                                                                                                                     |   |                                 |   |                                       |   |               |   |                  |   |                    |   |                   |   |                 |    |       |
| 1                                                                                                                                                    | Unverified                                                                                   |                                                                                                                    |                                                                                                                                                                                                                                                                                                                                                                                     |   |                                 |   |                                       |   |               |   |                  |   |                    |   |                   |   |                 |    |       |
| 2                                                                                                                                                    | Complete                                                                                     |                                                                                                                    |                                                                                                                                                                                                                                                                                                                                                                                     |   |                                 |   |                                       |   |               |   |                  |   |                    |   |                   |   |                 |    |       |
| Instrument: <b>Maidquestions</b> (maidquestions) 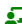 Enabled as survey |                                                                                              |                                                                                                                    |                                                                                                                                                                                                                                                                                                                                                                                     |   |                                 |   |                                       |   |               |   |                  |   |                    |   |                   |   |                 |    |       |
| 28                                                                                                                                                   | [ personal_seriousill ]                                                                      | Section Header: <i>Prior Knowledge</i><br>Do you have any personal experience with serious illness?                | radio <table><tr><td>1</td><td>Yes, my own illness</td></tr><tr><td>2</td><td>Yes, my loved one/close friend/family</td></tr><tr><td>3</td><td>Both</td></tr><tr><td>4</td><td>Neither</td></tr></table>                                                                                                                                                                            | 1 | Yes, my own illness             | 2 | Yes, my loved one/close friend/family | 3 | Both          | 4 | Neither          |   |                    |   |                   |   |                 |    |       |
| 1                                                                                                                                                    | Yes, my own illness                                                                          |                                                                                                                    |                                                                                                                                                                                                                                                                                                                                                                                     |   |                                 |   |                                       |   |               |   |                  |   |                    |   |                   |   |                 |    |       |
| 2                                                                                                                                                    | Yes, my loved one/close friend/family                                                        |                                                                                                                    |                                                                                                                                                                                                                                                                                                                                                                                     |   |                                 |   |                                       |   |               |   |                  |   |                    |   |                   |   |                 |    |       |
| 3                                                                                                                                                    | Both                                                                                         |                                                                                                                    |                                                                                                                                                                                                                                                                                                                                                                                     |   |                                 |   |                                       |   |               |   |                  |   |                    |   |                   |   |                 |    |       |
| 4                                                                                                                                                    | Neither                                                                                      |                                                                                                                    |                                                                                                                                                                                                                                                                                                                                                                                     |   |                                 |   |                                       |   |               |   |                  |   |                    |   |                   |   |                 |    |       |
| 29                                                                                                                                                   | [ personal_dwd ]                                                                             | Do you have any personal experience with Death with Dignity?                                                       | radio <table><tr><td>1</td><td>Yes, my loved one/friend/family</td></tr><tr><td>2</td><td>Yes, prior professional experience</td></tr><tr><td>3</td><td>Both</td></tr><tr><td>4</td><td>Neither</td></tr></table>                                                                                                                                                                   | 1 | Yes, my loved one/friend/family | 2 | Yes, prior professional experience    | 3 | Both          | 4 | Neither          |   |                    |   |                   |   |                 |    |       |
| 1                                                                                                                                                    | Yes, my loved one/friend/family                                                              |                                                                                                                    |                                                                                                                                                                                                                                                                                                                                                                                     |   |                                 |   |                                       |   |               |   |                  |   |                    |   |                   |   |                 |    |       |
| 2                                                                                                                                                    | Yes, prior professional experience                                                           |                                                                                                                    |                                                                                                                                                                                                                                                                                                                                                                                     |   |                                 |   |                                       |   |               |   |                  |   |                    |   |                   |   |                 |    |       |
| 3                                                                                                                                                    | Both                                                                                         |                                                                                                                    |                                                                                                                                                                                                                                                                                                                                                                                     |   |                                 |   |                                       |   |               |   |                  |   |                    |   |                   |   |                 |    |       |
| 4                                                                                                                                                    | Neither                                                                                      |                                                                                                                    |                                                                                                                                                                                                                                                                                                                                                                                     |   |                                 |   |                                       |   |               |   |                  |   |                    |   |                   |   |                 |    |       |
| 30                                                                                                                                                   | [ dwd_aware ]                                                                                | Prior to this survey, were you aware that Death with Dignity was legal in Washington State?                        | radio <table><tr><td>1</td><td>Yes, fully aware</td></tr><tr><td>2</td><td>Yes, somewhat aware</td></tr><tr><td>3</td><td>No, not aware</td></tr></table>                                                                                                                                                                                                                           | 1 | Yes, fully aware                | 2 | Yes, somewhat aware                   | 3 | No, not aware |   |                  |   |                    |   |                   |   |                 |    |       |
| 1                                                                                                                                                    | Yes, fully aware                                                                             |                                                                                                                    |                                                                                                                                                                                                                                                                                                                                                                                     |   |                                 |   |                                       |   |               |   |                  |   |                    |   |                   |   |                 |    |       |
| 2                                                                                                                                                    | Yes, somewhat aware                                                                          |                                                                                                                    |                                                                                                                                                                                                                                                                                                                                                                                     |   |                                 |   |                                       |   |               |   |                  |   |                    |   |                   |   |                 |    |       |
| 3                                                                                                                                                    | No, not aware                                                                                |                                                                                                                    |                                                                                                                                                                                                                                                                                                                                                                                     |   |                                 |   |                                       |   |               |   |                  |   |                    |   |                   |   |                 |    |       |
| 31                                                                                                                                                   | [ dwd_prior_education ]<br>Show the field ONLY if:<br>[dwd_aware] = '1' OR [dwd_aware] = '2' | Have you ever participated in any educational activities (e.g., grand rounds; didactics) about Death with Dignity? | yesno <table><tr><td>1</td><td>Yes</td></tr><tr><td>0</td><td>No</td></tr></table>                                                                                                                                                                                                                                                                                                  | 1 | Yes                             | 0 | No                                    |   |               |   |                  |   |                    |   |                   |   |                 |    |       |
| 1                                                                                                                                                    | Yes                                                                                          |                                                                                                                    |                                                                                                                                                                                                                                                                                                                                                                                     |   |                                 |   |                                       |   |               |   |                  |   |                    |   |                   |   |                 |    |       |
| 0                                                                                                                                                    | No                                                                                           |                                                                                                                    |                                                                                                                                                                                                                                                                                                                                                                                     |   |                                 |   |                                       |   |               |   |                  |   |                    |   |                   |   |                 |    |       |

|    |                                                                                                                           |                                                                                                                                                                                                                       |                                                                                                                                                                                                                                                                                                                                                                                                                                                                                                                                                                                                                                                                                                                                                                                                                                                                                                                                                                                                                                                                                                |   |                                    |                                                      |                                        |                   |                       |   |                   |                      |                  |                   |                                       |    |                   |                                |    |                   |                                       |   |                   |                                        |   |                   |                                                |   |                   |                                                                             |    |                    |       |    |                    |      |
|----|---------------------------------------------------------------------------------------------------------------------------|-----------------------------------------------------------------------------------------------------------------------------------------------------------------------------------------------------------------------|------------------------------------------------------------------------------------------------------------------------------------------------------------------------------------------------------------------------------------------------------------------------------------------------------------------------------------------------------------------------------------------------------------------------------------------------------------------------------------------------------------------------------------------------------------------------------------------------------------------------------------------------------------------------------------------------------------------------------------------------------------------------------------------------------------------------------------------------------------------------------------------------------------------------------------------------------------------------------------------------------------------------------------------------------------------------------------------------|---|------------------------------------|------------------------------------------------------|----------------------------------------|-------------------|-----------------------|---|-------------------|----------------------|------------------|-------------------|---------------------------------------|----|-------------------|--------------------------------|----|-------------------|---------------------------------------|---|-------------------|----------------------------------------|---|-------------------|------------------------------------------------|---|-------------------|-----------------------------------------------------------------------------|----|--------------------|-------|----|--------------------|------|
| 32 | [training_topic]                                                                                                          | Given that the proposed legislation would have allowed APP's to participate as prescribing or consulting clinicians in Death with Dignity, what training do you think APP's would need, if any? Select all that apply | checkbox <table border="1"> <tr> <td>1</td> <td>training_topic__1</td> <td>General information about Death with Dignity process</td> </tr> <tr> <td>2</td> <td>training_topic__2</td> <td>Assessing eligibility</td> </tr> <tr> <td>3</td> <td>training_topic__3</td> <td>Estimating prognosis</td> </tr> <tr> <td>4</td> <td>training_topic__4</td> <td>Educating the patient (and/or family)</td> </tr> <tr> <td>5</td> <td>training_topic__5</td> <td>Responding to patient requests</td> </tr> <tr> <td>6</td> <td>training_topic__6</td> <td>Consulting clinician responsibilities</td> </tr> <tr> <td>7</td> <td>training_topic__7</td> <td>Prescribing clinician responsibilities</td> </tr> <tr> <td>8</td> <td>training_topic__8</td> <td>Knowledge about Death with Dignity medications</td> </tr> <tr> <td>9</td> <td>training_topic__9</td> <td>Education regarding meeting legal requirements (i.e. waiting period, forms)</td> </tr> <tr> <td>88</td> <td>training_topic__88</td> <td>Other</td> </tr> <tr> <td>99</td> <td>training_topic__99</td> <td>None</td> </tr> </table> | 1 | training_topic__1                  | General information about Death with Dignity process | 2                                      | training_topic__2 | Assessing eligibility | 3 | training_topic__3 | Estimating prognosis | 4                | training_topic__4 | Educating the patient (and/or family) | 5  | training_topic__5 | Responding to patient requests | 6  | training_topic__6 | Consulting clinician responsibilities | 7 | training_topic__7 | Prescribing clinician responsibilities | 8 | training_topic__8 | Knowledge about Death with Dignity medications | 9 | training_topic__9 | Education regarding meeting legal requirements (i.e. waiting period, forms) | 88 | training_topic__88 | Other | 99 | training_topic__99 | None |
| 1  | training_topic__1                                                                                                         | General information about Death with Dignity process                                                                                                                                                                  |                                                                                                                                                                                                                                                                                                                                                                                                                                                                                                                                                                                                                                                                                                                                                                                                                                                                                                                                                                                                                                                                                                |   |                                    |                                                      |                                        |                   |                       |   |                   |                      |                  |                   |                                       |    |                   |                                |    |                   |                                       |   |                   |                                        |   |                   |                                                |   |                   |                                                                             |    |                    |       |    |                    |      |
| 2  | training_topic__2                                                                                                         | Assessing eligibility                                                                                                                                                                                                 |                                                                                                                                                                                                                                                                                                                                                                                                                                                                                                                                                                                                                                                                                                                                                                                                                                                                                                                                                                                                                                                                                                |   |                                    |                                                      |                                        |                   |                       |   |                   |                      |                  |                   |                                       |    |                   |                                |    |                   |                                       |   |                   |                                        |   |                   |                                                |   |                   |                                                                             |    |                    |       |    |                    |      |
| 3  | training_topic__3                                                                                                         | Estimating prognosis                                                                                                                                                                                                  |                                                                                                                                                                                                                                                                                                                                                                                                                                                                                                                                                                                                                                                                                                                                                                                                                                                                                                                                                                                                                                                                                                |   |                                    |                                                      |                                        |                   |                       |   |                   |                      |                  |                   |                                       |    |                   |                                |    |                   |                                       |   |                   |                                        |   |                   |                                                |   |                   |                                                                             |    |                    |       |    |                    |      |
| 4  | training_topic__4                                                                                                         | Educating the patient (and/or family)                                                                                                                                                                                 |                                                                                                                                                                                                                                                                                                                                                                                                                                                                                                                                                                                                                                                                                                                                                                                                                                                                                                                                                                                                                                                                                                |   |                                    |                                                      |                                        |                   |                       |   |                   |                      |                  |                   |                                       |    |                   |                                |    |                   |                                       |   |                   |                                        |   |                   |                                                |   |                   |                                                                             |    |                    |       |    |                    |      |
| 5  | training_topic__5                                                                                                         | Responding to patient requests                                                                                                                                                                                        |                                                                                                                                                                                                                                                                                                                                                                                                                                                                                                                                                                                                                                                                                                                                                                                                                                                                                                                                                                                                                                                                                                |   |                                    |                                                      |                                        |                   |                       |   |                   |                      |                  |                   |                                       |    |                   |                                |    |                   |                                       |   |                   |                                        |   |                   |                                                |   |                   |                                                                             |    |                    |       |    |                    |      |
| 6  | training_topic__6                                                                                                         | Consulting clinician responsibilities                                                                                                                                                                                 |                                                                                                                                                                                                                                                                                                                                                                                                                                                                                                                                                                                                                                                                                                                                                                                                                                                                                                                                                                                                                                                                                                |   |                                    |                                                      |                                        |                   |                       |   |                   |                      |                  |                   |                                       |    |                   |                                |    |                   |                                       |   |                   |                                        |   |                   |                                                |   |                   |                                                                             |    |                    |       |    |                    |      |
| 7  | training_topic__7                                                                                                         | Prescribing clinician responsibilities                                                                                                                                                                                |                                                                                                                                                                                                                                                                                                                                                                                                                                                                                                                                                                                                                                                                                                                                                                                                                                                                                                                                                                                                                                                                                                |   |                                    |                                                      |                                        |                   |                       |   |                   |                      |                  |                   |                                       |    |                   |                                |    |                   |                                       |   |                   |                                        |   |                   |                                                |   |                   |                                                                             |    |                    |       |    |                    |      |
| 8  | training_topic__8                                                                                                         | Knowledge about Death with Dignity medications                                                                                                                                                                        |                                                                                                                                                                                                                                                                                                                                                                                                                                                                                                                                                                                                                                                                                                                                                                                                                                                                                                                                                                                                                                                                                                |   |                                    |                                                      |                                        |                   |                       |   |                   |                      |                  |                   |                                       |    |                   |                                |    |                   |                                       |   |                   |                                        |   |                   |                                                |   |                   |                                                                             |    |                    |       |    |                    |      |
| 9  | training_topic__9                                                                                                         | Education regarding meeting legal requirements (i.e. waiting period, forms)                                                                                                                                           |                                                                                                                                                                                                                                                                                                                                                                                                                                                                                                                                                                                                                                                                                                                                                                                                                                                                                                                                                                                                                                                                                                |   |                                    |                                                      |                                        |                   |                       |   |                   |                      |                  |                   |                                       |    |                   |                                |    |                   |                                       |   |                   |                                        |   |                   |                                                |   |                   |                                                                             |    |                    |       |    |                    |      |
| 88 | training_topic__88                                                                                                        | Other                                                                                                                                                                                                                 |                                                                                                                                                                                                                                                                                                                                                                                                                                                                                                                                                                                                                                                                                                                                                                                                                                                                                                                                                                                                                                                                                                |   |                                    |                                                      |                                        |                   |                       |   |                   |                      |                  |                   |                                       |    |                   |                                |    |                   |                                       |   |                   |                                        |   |                   |                                                |   |                   |                                                                             |    |                    |       |    |                    |      |
| 99 | training_topic__99                                                                                                        | None                                                                                                                                                                                                                  |                                                                                                                                                                                                                                                                                                                                                                                                                                                                                                                                                                                                                                                                                                                                                                                                                                                                                                                                                                                                                                                                                                |   |                                    |                                                      |                                        |                   |                       |   |                   |                      |                  |                   |                                       |    |                   |                                |    |                   |                                       |   |                   |                                        |   |                   |                                                |   |                   |                                                                             |    |                    |       |    |                    |      |
| 33 | [support]                                                                                                                 | What type of training do you think would be useful? Select all that apply                                                                                                                                             | checkbox <table border="1"> <tr> <td>1</td> <td>support__1</td> <td>Group Training</td> </tr> <tr> <td>2</td> <td>support__2</td> <td>1:1 Training</td> </tr> <tr> <td>3</td> <td>support__3</td> <td>Shadowing</td> </tr> <tr> <td>4</td> <td>support__4</td> <td>Didactic (Reading, Lectures)</td> </tr> <tr> <td>88</td> <td>support__88</td> <td>Other</td> </tr> <tr> <td>99</td> <td>support__99</td> <td>None</td> </tr> </table>                                                                                                                                                                                                                                                                                                                                                                                                                                                                                                                                                                                                                                                       | 1 | support__1                         | Group Training                                       | 2                                      | support__2        | 1:1 Training          | 3 | support__3        | Shadowing            | 4                | support__4        | Didactic (Reading, Lectures)          | 88 | support__88       | Other                          | 99 | support__99       | None                                  |   |                   |                                        |   |                   |                                                |   |                   |                                                                             |    |                    |       |    |                    |      |
| 1  | support__1                                                                                                                | Group Training                                                                                                                                                                                                        |                                                                                                                                                                                                                                                                                                                                                                                                                                                                                                                                                                                                                                                                                                                                                                                                                                                                                                                                                                                                                                                                                                |   |                                    |                                                      |                                        |                   |                       |   |                   |                      |                  |                   |                                       |    |                   |                                |    |                   |                                       |   |                   |                                        |   |                   |                                                |   |                   |                                                                             |    |                    |       |    |                    |      |
| 2  | support__2                                                                                                                | 1:1 Training                                                                                                                                                                                                          |                                                                                                                                                                                                                                                                                                                                                                                                                                                                                                                                                                                                                                                                                                                                                                                                                                                                                                                                                                                                                                                                                                |   |                                    |                                                      |                                        |                   |                       |   |                   |                      |                  |                   |                                       |    |                   |                                |    |                   |                                       |   |                   |                                        |   |                   |                                                |   |                   |                                                                             |    |                    |       |    |                    |      |
| 3  | support__3                                                                                                                | Shadowing                                                                                                                                                                                                             |                                                                                                                                                                                                                                                                                                                                                                                                                                                                                                                                                                                                                                                                                                                                                                                                                                                                                                                                                                                                                                                                                                |   |                                    |                                                      |                                        |                   |                       |   |                   |                      |                  |                   |                                       |    |                   |                                |    |                   |                                       |   |                   |                                        |   |                   |                                                |   |                   |                                                                             |    |                    |       |    |                    |      |
| 4  | support__4                                                                                                                | Didactic (Reading, Lectures)                                                                                                                                                                                          |                                                                                                                                                                                                                                                                                                                                                                                                                                                                                                                                                                                                                                                                                                                                                                                                                                                                                                                                                                                                                                                                                                |   |                                    |                                                      |                                        |                   |                       |   |                   |                      |                  |                   |                                       |    |                   |                                |    |                   |                                       |   |                   |                                        |   |                   |                                                |   |                   |                                                                             |    |                    |       |    |                    |      |
| 88 | support__88                                                                                                               | Other                                                                                                                                                                                                                 |                                                                                                                                                                                                                                                                                                                                                                                                                                                                                                                                                                                                                                                                                                                                                                                                                                                                                                                                                                                                                                                                                                |   |                                    |                                                      |                                        |                   |                       |   |                   |                      |                  |                   |                                       |    |                   |                                |    |                   |                                       |   |                   |                                        |   |                   |                                                |   |                   |                                                                             |    |                    |       |    |                    |      |
| 99 | support__99                                                                                                               | None                                                                                                                                                                                                                  |                                                                                                                                                                                                                                                                                                                                                                                                                                                                                                                                                                                                                                                                                                                                                                                                                                                                                                                                                                                                                                                                                                |   |                                    |                                                      |                                        |                   |                       |   |                   |                      |                  |                   |                                       |    |                   |                                |    |                   |                                       |   |                   |                                        |   |                   |                                                |   |                   |                                                                             |    |                    |       |    |                    |      |
| 34 | [support_other]<br>Show the field ONLY if:<br>[support(88)] = '1'                                                         | If another kind of support is needed, please specify:                                                                                                                                                                 | text                                                                                                                                                                                                                                                                                                                                                                                                                                                                                                                                                                                                                                                                                                                                                                                                                                                                                                                                                                                                                                                                                           |   |                                    |                                                      |                                        |                   |                       |   |                   |                      |                  |                   |                                       |    |                   |                                |    |                   |                                       |   |                   |                                        |   |                   |                                                |   |                   |                                                                             |    |                    |       |    |                    |      |
| 35 | [planning]                                                                                                                | If it were legal for APP's to participate as consulting or prescribing clinicians, would you plan on participating in Death with Dignity, in any capacity?                                                            | radio <table border="1"> <tr> <td>1</td> <td>Yes, as consulting and prescribing</td> </tr> <tr> <td>2</td> <td>Yes, as consulting but not prescribing</td> </tr> <tr> <td>3</td> <td>Unsure</td> </tr> <tr> <td>4</td> <td>No</td> </tr> </table>                                                                                                                                                                                                                                                                                                                                                                                                                                                                                                                                                                                                                                                                                                                                                                                                                                              | 1 | Yes, as consulting and prescribing | 2                                                    | Yes, as consulting but not prescribing | 3                 | Unsure                | 4 | No                |                      |                  |                   |                                       |    |                   |                                |    |                   |                                       |   |                   |                                        |   |                   |                                                |   |                   |                                                                             |    |                    |       |    |                    |      |
| 1  | Yes, as consulting and prescribing                                                                                        |                                                                                                                                                                                                                       |                                                                                                                                                                                                                                                                                                                                                                                                                                                                                                                                                                                                                                                                                                                                                                                                                                                                                                                                                                                                                                                                                                |   |                                    |                                                      |                                        |                   |                       |   |                   |                      |                  |                   |                                       |    |                   |                                |    |                   |                                       |   |                   |                                        |   |                   |                                                |   |                   |                                                                             |    |                    |       |    |                    |      |
| 2  | Yes, as consulting but not prescribing                                                                                    |                                                                                                                                                                                                                       |                                                                                                                                                                                                                                                                                                                                                                                                                                                                                                                                                                                                                                                                                                                                                                                                                                                                                                                                                                                                                                                                                                |   |                                    |                                                      |                                        |                   |                       |   |                   |                      |                  |                   |                                       |    |                   |                                |    |                   |                                       |   |                   |                                        |   |                   |                                                |   |                   |                                                                             |    |                    |       |    |                    |      |
| 3  | Unsure                                                                                                                    |                                                                                                                                                                                                                       |                                                                                                                                                                                                                                                                                                                                                                                                                                                                                                                                                                                                                                                                                                                                                                                                                                                                                                                                                                                                                                                                                                |   |                                    |                                                      |                                        |                   |                       |   |                   |                      |                  |                   |                                       |    |                   |                                |    |                   |                                       |   |                   |                                        |   |                   |                                                |   |                   |                                                                             |    |                    |       |    |                    |      |
| 4  | No                                                                                                                        |                                                                                                                                                                                                                       |                                                                                                                                                                                                                                                                                                                                                                                                                                                                                                                                                                                                                                                                                                                                                                                                                                                                                                                                                                                                                                                                                                |   |                                    |                                                      |                                        |                   |                       |   |                   |                      |                  |                   |                                       |    |                   |                                |    |                   |                                       |   |                   |                                        |   |                   |                                                |   |                   |                                                                             |    |                    |       |    |                    |      |
| 36 | [planning_why]<br>Show the field ONLY if:<br>[planning] = '1' OR [planning] = '2' OR [planning] = '3' OR [planning] = '4' | Please tell us why:                                                                                                                                                                                                   | notes                                                                                                                                                                                                                                                                                                                                                                                                                                                                                                                                                                                                                                                                                                                                                                                                                                                                                                                                                                                                                                                                                          |   |                                    |                                                      |                                        |                   |                       |   |                   |                      |                  |                   |                                       |    |                   |                                |    |                   |                                       |   |                   |                                        |   |                   |                                                |   |                   |                                                                             |    |                    |       |    |                    |      |
| 37 | [comfort_1]                                                                                                               | Section Header: <i>Please respond to the question: "In regards to Death with Dignity, how comfortable do you feel about..."</i><br><br>Advanced Practice Providers proposed role in Death with Dignity?               | radio (Matrix) <table border="1"> <tr> <td>1</td> <td>Very Uncomfortable</td> </tr> <tr> <td>2</td> <td>Uncomfortable</td> </tr> <tr> <td>3</td> <td>Somewhat Comfortable</td> </tr> <tr> <td>4</td> <td>Comfortable</td> </tr> <tr> <td>5</td> <td>Very Comfortable</td> </tr> </table>                                                                                                                                                                                                                                                                                                                                                                                                                                                                                                                                                                                                                                                                                                                                                                                                       | 1 | Very Uncomfortable                 | 2                                                    | Uncomfortable                          | 3                 | Somewhat Comfortable  | 4 | Comfortable       | 5                    | Very Comfortable |                   |                                       |    |                   |                                |    |                   |                                       |   |                   |                                        |   |                   |                                                |   |                   |                                                                             |    |                    |       |    |                    |      |
| 1  | Very Uncomfortable                                                                                                        |                                                                                                                                                                                                                       |                                                                                                                                                                                                                                                                                                                                                                                                                                                                                                                                                                                                                                                                                                                                                                                                                                                                                                                                                                                                                                                                                                |   |                                    |                                                      |                                        |                   |                       |   |                   |                      |                  |                   |                                       |    |                   |                                |    |                   |                                       |   |                   |                                        |   |                   |                                                |   |                   |                                                                             |    |                    |       |    |                    |      |
| 2  | Uncomfortable                                                                                                             |                                                                                                                                                                                                                       |                                                                                                                                                                                                                                                                                                                                                                                                                                                                                                                                                                                                                                                                                                                                                                                                                                                                                                                                                                                                                                                                                                |   |                                    |                                                      |                                        |                   |                       |   |                   |                      |                  |                   |                                       |    |                   |                                |    |                   |                                       |   |                   |                                        |   |                   |                                                |   |                   |                                                                             |    |                    |       |    |                    |      |
| 3  | Somewhat Comfortable                                                                                                      |                                                                                                                                                                                                                       |                                                                                                                                                                                                                                                                                                                                                                                                                                                                                                                                                                                                                                                                                                                                                                                                                                                                                                                                                                                                                                                                                                |   |                                    |                                                      |                                        |                   |                       |   |                   |                      |                  |                   |                                       |    |                   |                                |    |                   |                                       |   |                   |                                        |   |                   |                                                |   |                   |                                                                             |    |                    |       |    |                    |      |
| 4  | Comfortable                                                                                                               |                                                                                                                                                                                                                       |                                                                                                                                                                                                                                                                                                                                                                                                                                                                                                                                                                                                                                                                                                                                                                                                                                                                                                                                                                                                                                                                                                |   |                                    |                                                      |                                        |                   |                       |   |                   |                      |                  |                   |                                       |    |                   |                                |    |                   |                                       |   |                   |                                        |   |                   |                                                |   |                   |                                                                             |    |                    |       |    |                    |      |
| 5  | Very Comfortable                                                                                                          |                                                                                                                                                                                                                       |                                                                                                                                                                                                                                                                                                                                                                                                                                                                                                                                                                                                                                                                                                                                                                                                                                                                                                                                                                                                                                                                                                |   |                                    |                                                      |                                        |                   |                       |   |                   |                      |                  |                   |                                       |    |                   |                                |    |                   |                                       |   |                   |                                        |   |                   |                                                |   |                   |                                                                             |    |                    |       |    |                    |      |

|    |                          |                                                                                                                                                                                                 |                                                                                                                                                                                                                                                                                          |   |                          |   |                        |   |                        |   |               |   |                    |
|----|--------------------------|-------------------------------------------------------------------------------------------------------------------------------------------------------------------------------------------------|------------------------------------------------------------------------------------------------------------------------------------------------------------------------------------------------------------------------------------------------------------------------------------------|---|--------------------------|---|------------------------|---|------------------------|---|---------------|---|--------------------|
| 38 | [comfort_2]              | Responding to patient requests for Death with Dignity?                                                                                                                                          | <div>radio (Matrix)</div> <table><tr><td>1</td><td>Very Uncomfortable</td></tr><tr><td>2</td><td>Uncomfortable</td></tr><tr><td>3</td><td>Somewhat Comfortable</td></tr><tr><td>4</td><td>Comfortable</td></tr><tr><td>5</td><td>Very Comfortable</td></tr></table>                      | 1 | Very Uncomfortable       | 2 | Uncomfortable          | 3 | Somewhat Comfortable   | 4 | Comfortable   | 5 | Very Comfortable   |
| 1  | Very Uncomfortable       |                                                                                                                                                                                                 |                                                                                                                                                                                                                                                                                          |   |                          |   |                        |   |                        |   |               |   |                    |
| 2  | Uncomfortable            |                                                                                                                                                                                                 |                                                                                                                                                                                                                                                                                          |   |                          |   |                        |   |                        |   |               |   |                    |
| 3  | Somewhat Comfortable     |                                                                                                                                                                                                 |                                                                                                                                                                                                                                                                                          |   |                          |   |                        |   |                        |   |               |   |                    |
| 4  | Comfortable              |                                                                                                                                                                                                 |                                                                                                                                                                                                                                                                                          |   |                          |   |                        |   |                        |   |               |   |                    |
| 5  | Very Comfortable         |                                                                                                                                                                                                 |                                                                                                                                                                                                                                                                                          |   |                          |   |                        |   |                        |   |               |   |                    |
| 39 | [comfort_3]              | Raising Death with Dignity as a possible option for your patients?                                                                                                                              | <div>radio (Matrix)</div> <table><tr><td>1</td><td>Very Uncomfortable</td></tr><tr><td>2</td><td>Uncomfortable</td></tr><tr><td>3</td><td>Somewhat Comfortable</td></tr><tr><td>4</td><td>Comfortable</td></tr><tr><td>5</td><td>Very Comfortable</td></tr></table>                      | 1 | Very Uncomfortable       | 2 | Uncomfortable          | 3 | Somewhat Comfortable   | 4 | Comfortable   | 5 | Very Comfortable   |
| 1  | Very Uncomfortable       |                                                                                                                                                                                                 |                                                                                                                                                                                                                                                                                          |   |                          |   |                        |   |                        |   |               |   |                    |
| 2  | Uncomfortable            |                                                                                                                                                                                                 |                                                                                                                                                                                                                                                                                          |   |                          |   |                        |   |                        |   |               |   |                    |
| 3  | Somewhat Comfortable     |                                                                                                                                                                                                 |                                                                                                                                                                                                                                                                                          |   |                          |   |                        |   |                        |   |               |   |                    |
| 4  | Comfortable              |                                                                                                                                                                                                 |                                                                                                                                                                                                                                                                                          |   |                          |   |                        |   |                        |   |               |   |                    |
| 5  | Very Comfortable         |                                                                                                                                                                                                 |                                                                                                                                                                                                                                                                                          |   |                          |   |                        |   |                        |   |               |   |                    |
| 40 | [comfort_4]              | Defining prognosis?                                                                                                                                                                             | <div>radio (Matrix)</div> <table><tr><td>1</td><td>Very Uncomfortable</td></tr><tr><td>2</td><td>Uncomfortable</td></tr><tr><td>3</td><td>Somewhat Comfortable</td></tr><tr><td>4</td><td>Comfortable</td></tr><tr><td>5</td><td>Very Comfortable</td></tr></table>                      | 1 | Very Uncomfortable       | 2 | Uncomfortable          | 3 | Somewhat Comfortable   | 4 | Comfortable   | 5 | Very Comfortable   |
| 1  | Very Uncomfortable       |                                                                                                                                                                                                 |                                                                                                                                                                                                                                                                                          |   |                          |   |                        |   |                        |   |               |   |                    |
| 2  | Uncomfortable            |                                                                                                                                                                                                 |                                                                                                                                                                                                                                                                                          |   |                          |   |                        |   |                        |   |               |   |                    |
| 3  | Somewhat Comfortable     |                                                                                                                                                                                                 |                                                                                                                                                                                                                                                                                          |   |                          |   |                        |   |                        |   |               |   |                    |
| 4  | Comfortable              |                                                                                                                                                                                                 |                                                                                                                                                                                                                                                                                          |   |                          |   |                        |   |                        |   |               |   |                    |
| 5  | Very Comfortable         |                                                                                                                                                                                                 |                                                                                                                                                                                                                                                                                          |   |                          |   |                        |   |                        |   |               |   |                    |
| 41 | [comfort_6]              | Acting as the consulting clinician?                                                                                                                                                             | <div>radio (Matrix)</div> <table><tr><td>1</td><td>Very Uncomfortable</td></tr><tr><td>2</td><td>Uncomfortable</td></tr><tr><td>3</td><td>Somewhat Comfortable</td></tr><tr><td>4</td><td>Comfortable</td></tr><tr><td>5</td><td>Very Comfortable</td></tr></table>                      | 1 | Very Uncomfortable       | 2 | Uncomfortable          | 3 | Somewhat Comfortable   | 4 | Comfortable   | 5 | Very Comfortable   |
| 1  | Very Uncomfortable       |                                                                                                                                                                                                 |                                                                                                                                                                                                                                                                                          |   |                          |   |                        |   |                        |   |               |   |                    |
| 2  | Uncomfortable            |                                                                                                                                                                                                 |                                                                                                                                                                                                                                                                                          |   |                          |   |                        |   |                        |   |               |   |                    |
| 3  | Somewhat Comfortable     |                                                                                                                                                                                                 |                                                                                                                                                                                                                                                                                          |   |                          |   |                        |   |                        |   |               |   |                    |
| 4  | Comfortable              |                                                                                                                                                                                                 |                                                                                                                                                                                                                                                                                          |   |                          |   |                        |   |                        |   |               |   |                    |
| 5  | Very Comfortable         |                                                                                                                                                                                                 |                                                                                                                                                                                                                                                                                          |   |                          |   |                        |   |                        |   |               |   |                    |
| 42 | [comfort_7]              | Prescribing Death With Dignity medications?                                                                                                                                                     | <div>radio (Matrix)</div> <table><tr><td>1</td><td>Very Uncomfortable</td></tr><tr><td>2</td><td>Uncomfortable</td></tr><tr><td>3</td><td>Somewhat Comfortable</td></tr><tr><td>4</td><td>Comfortable</td></tr><tr><td>5</td><td>Very Comfortable</td></tr></table>                      | 1 | Very Uncomfortable       | 2 | Uncomfortable          | 3 | Somewhat Comfortable   | 4 | Comfortable   | 5 | Very Comfortable   |
| 1  | Very Uncomfortable       |                                                                                                                                                                                                 |                                                                                                                                                                                                                                                                                          |   |                          |   |                        |   |                        |   |               |   |                    |
| 2  | Uncomfortable            |                                                                                                                                                                                                 |                                                                                                                                                                                                                                                                                          |   |                          |   |                        |   |                        |   |               |   |                    |
| 3  | Somewhat Comfortable     |                                                                                                                                                                                                 |                                                                                                                                                                                                                                                                                          |   |                          |   |                        |   |                        |   |               |   |                    |
| 4  | Comfortable              |                                                                                                                                                                                                 |                                                                                                                                                                                                                                                                                          |   |                          |   |                        |   |                        |   |               |   |                    |
| 5  | Very Comfortable         |                                                                                                                                                                                                 |                                                                                                                                                                                                                                                                                          |   |                          |   |                        |   |                        |   |               |   |                    |
| 43 | [comfort_8]              | Discussing with family and loved ones the patient's decision to pursue Death with Dignity?                                                                                                      | <div>radio (Matrix)</div> <table><tr><td>1</td><td>Very Uncomfortable</td></tr><tr><td>2</td><td>Uncomfortable</td></tr><tr><td>3</td><td>Somewhat Comfortable</td></tr><tr><td>4</td><td>Comfortable</td></tr><tr><td>5</td><td>Very Comfortable</td></tr></table>                      | 1 | Very Uncomfortable       | 2 | Uncomfortable          | 3 | Somewhat Comfortable   | 4 | Comfortable   | 5 | Very Comfortable   |
| 1  | Very Uncomfortable       |                                                                                                                                                                                                 |                                                                                                                                                                                                                                                                                          |   |                          |   |                        |   |                        |   |               |   |                    |
| 2  | Uncomfortable            |                                                                                                                                                                                                 |                                                                                                                                                                                                                                                                                          |   |                          |   |                        |   |                        |   |               |   |                    |
| 3  | Somewhat Comfortable     |                                                                                                                                                                                                 |                                                                                                                                                                                                                                                                                          |   |                          |   |                        |   |                        |   |               |   |                    |
| 4  | Comfortable              |                                                                                                                                                                                                 |                                                                                                                                                                                                                                                                                          |   |                          |   |                        |   |                        |   |               |   |                    |
| 5  | Very Comfortable         |                                                                                                                                                                                                 |                                                                                                                                                                                                                                                                                          |   |                          |   |                        |   |                        |   |               |   |                    |
| 44 | [knowledge_1]            | <div>Section Header: <i>Please respond to the question: "In regards to Death with Dignity, how knowledgeable do you feel about..."</i></div> <div>Assessing the eligibility of a patient?</div> | <div>radio (Matrix)</div> <table><tr><td>1</td><td>Not at All Knowledgeable</td></tr><tr><td>2</td><td>Not Very Knowledgeable</td></tr><tr><td>3</td><td>Somewhat Knowledgeable</td></tr><tr><td>4</td><td>Knowledgeable</td></tr><tr><td>5</td><td>Very Knowledgeable</td></tr></table> | 1 | Not at All Knowledgeable | 2 | Not Very Knowledgeable | 3 | Somewhat Knowledgeable | 4 | Knowledgeable | 5 | Very Knowledgeable |
| 1  | Not at All Knowledgeable |                                                                                                                                                                                                 |                                                                                                                                                                                                                                                                                          |   |                          |   |                        |   |                        |   |               |   |                    |
| 2  | Not Very Knowledgeable   |                                                                                                                                                                                                 |                                                                                                                                                                                                                                                                                          |   |                          |   |                        |   |                        |   |               |   |                    |
| 3  | Somewhat Knowledgeable   |                                                                                                                                                                                                 |                                                                                                                                                                                                                                                                                          |   |                          |   |                        |   |                        |   |               |   |                    |
| 4  | Knowledgeable            |                                                                                                                                                                                                 |                                                                                                                                                                                                                                                                                          |   |                          |   |                        |   |                        |   |               |   |                    |
| 5  | Very Knowledgeable       |                                                                                                                                                                                                 |                                                                                                                                                                                                                                                                                          |   |                          |   |                        |   |                        |   |               |   |                    |
| 45 | [knowledge_2]            | Defining prognosis?                                                                                                                                                                             | <div>radio (Matrix)</div> <table><tr><td>1</td><td>Not at All Knowledgeable</td></tr><tr><td>2</td><td>Not Very Knowledgeable</td></tr><tr><td>3</td><td>Somewhat Knowledgeable</td></tr><tr><td>4</td><td>Knowledgeable</td></tr><tr><td>5</td><td>Very Knowledgeable</td></tr></table> | 1 | Not at All Knowledgeable | 2 | Not Very Knowledgeable | 3 | Somewhat Knowledgeable | 4 | Knowledgeable | 5 | Very Knowledgeable |
| 1  | Not at All Knowledgeable |                                                                                                                                                                                                 |                                                                                                                                                                                                                                                                                          |   |                          |   |                        |   |                        |   |               |   |                    |
| 2  | Not Very Knowledgeable   |                                                                                                                                                                                                 |                                                                                                                                                                                                                                                                                          |   |                          |   |                        |   |                        |   |               |   |                    |
| 3  | Somewhat Knowledgeable   |                                                                                                                                                                                                 |                                                                                                                                                                                                                                                                                          |   |                          |   |                        |   |                        |   |               |   |                    |
| 4  | Knowledgeable            |                                                                                                                                                                                                 |                                                                                                                                                                                                                                                                                          |   |                          |   |                        |   |                        |   |               |   |                    |
| 5  | Very Knowledgeable       |                                                                                                                                                                                                 |                                                                                                                                                                                                                                                                                          |   |                          |   |                        |   |                        |   |               |   |                    |

|    |                          |                                                                                                                   |                                                                                                                                                                                                                                                                                                |   |                          |   |                        |   |                        |   |                  |   |                       |
|----|--------------------------|-------------------------------------------------------------------------------------------------------------------|------------------------------------------------------------------------------------------------------------------------------------------------------------------------------------------------------------------------------------------------------------------------------------------------|---|--------------------------|---|------------------------|---|------------------------|---|------------------|---|-----------------------|
| 46 | [knowledge_3]            | Educating the patient (and/or their family)?                                                                      | radio (Matrix) <table border="1"> <tr><td>1</td><td>Not at All Knowledgeable</td></tr> <tr><td>2</td><td>Not Very Knowledgeable</td></tr> <tr><td>3</td><td>Somewhat Knowledgeable</td></tr> <tr><td>4</td><td>Knowledgeable</td></tr> <tr><td>5</td><td>Very Knowledgeable</td></tr> </table> | 1 | Not at All Knowledgeable | 2 | Not Very Knowledgeable | 3 | Somewhat Knowledgeable | 4 | Knowledgeable    | 5 | Very Knowledgeable    |
| 1  | Not at All Knowledgeable |                                                                                                                   |                                                                                                                                                                                                                                                                                                |   |                          |   |                        |   |                        |   |                  |   |                       |
| 2  | Not Very Knowledgeable   |                                                                                                                   |                                                                                                                                                                                                                                                                                                |   |                          |   |                        |   |                        |   |                  |   |                       |
| 3  | Somewhat Knowledgeable   |                                                                                                                   |                                                                                                                                                                                                                                                                                                |   |                          |   |                        |   |                        |   |                  |   |                       |
| 4  | Knowledgeable            |                                                                                                                   |                                                                                                                                                                                                                                                                                                |   |                          |   |                        |   |                        |   |                  |   |                       |
| 5  | Very Knowledgeable       |                                                                                                                   |                                                                                                                                                                                                                                                                                                |   |                          |   |                        |   |                        |   |                  |   |                       |
| 47 | [knowledge_4]            | Acting as the consulting clinician?                                                                               | radio (Matrix) <table border="1"> <tr><td>1</td><td>Not at All Knowledgeable</td></tr> <tr><td>2</td><td>Not Very Knowledgeable</td></tr> <tr><td>3</td><td>Somewhat Knowledgeable</td></tr> <tr><td>4</td><td>Knowledgeable</td></tr> <tr><td>5</td><td>Very Knowledgeable</td></tr> </table> | 1 | Not at All Knowledgeable | 2 | Not Very Knowledgeable | 3 | Somewhat Knowledgeable | 4 | Knowledgeable    | 5 | Very Knowledgeable    |
| 1  | Not at All Knowledgeable |                                                                                                                   |                                                                                                                                                                                                                                                                                                |   |                          |   |                        |   |                        |   |                  |   |                       |
| 2  | Not Very Knowledgeable   |                                                                                                                   |                                                                                                                                                                                                                                                                                                |   |                          |   |                        |   |                        |   |                  |   |                       |
| 3  | Somewhat Knowledgeable   |                                                                                                                   |                                                                                                                                                                                                                                                                                                |   |                          |   |                        |   |                        |   |                  |   |                       |
| 4  | Knowledgeable            |                                                                                                                   |                                                                                                                                                                                                                                                                                                |   |                          |   |                        |   |                        |   |                  |   |                       |
| 5  | Very Knowledgeable       |                                                                                                                   |                                                                                                                                                                                                                                                                                                |   |                          |   |                        |   |                        |   |                  |   |                       |
| 48 | [knowledge_5]            | Prescribing Death With Dignity medications?                                                                       | radio (Matrix) <table border="1"> <tr><td>1</td><td>Not at All Knowledgeable</td></tr> <tr><td>2</td><td>Not Very Knowledgeable</td></tr> <tr><td>3</td><td>Somewhat Knowledgeable</td></tr> <tr><td>4</td><td>Knowledgeable</td></tr> <tr><td>5</td><td>Very Knowledgeable</td></tr> </table> | 1 | Not at All Knowledgeable | 2 | Not Very Knowledgeable | 3 | Somewhat Knowledgeable | 4 | Knowledgeable    | 5 | Very Knowledgeable    |
| 1  | Not at All Knowledgeable |                                                                                                                   |                                                                                                                                                                                                                                                                                                |   |                          |   |                        |   |                        |   |                  |   |                       |
| 2  | Not Very Knowledgeable   |                                                                                                                   |                                                                                                                                                                                                                                                                                                |   |                          |   |                        |   |                        |   |                  |   |                       |
| 3  | Somewhat Knowledgeable   |                                                                                                                   |                                                                                                                                                                                                                                                                                                |   |                          |   |                        |   |                        |   |                  |   |                       |
| 4  | Knowledgeable            |                                                                                                                   |                                                                                                                                                                                                                                                                                                |   |                          |   |                        |   |                        |   |                  |   |                       |
| 5  | Very Knowledgeable       |                                                                                                                   |                                                                                                                                                                                                                                                                                                |   |                          |   |                        |   |                        |   |                  |   |                       |
| 49 | [knowledge_7]            | Accurately following the legal requirements (e.g. waiting period, forms)                                          | radio (Matrix) <table border="1"> <tr><td>1</td><td>Not at All Knowledgeable</td></tr> <tr><td>2</td><td>Not Very Knowledgeable</td></tr> <tr><td>3</td><td>Somewhat Knowledgeable</td></tr> <tr><td>4</td><td>Knowledgeable</td></tr> <tr><td>5</td><td>Very Knowledgeable</td></tr> </table> | 1 | Not at All Knowledgeable | 2 | Not Very Knowledgeable | 3 | Somewhat Knowledgeable | 4 | Knowledgeable    | 5 | Very Knowledgeable    |
| 1  | Not at All Knowledgeable |                                                                                                                   |                                                                                                                                                                                                                                                                                                |   |                          |   |                        |   |                        |   |                  |   |                       |
| 2  | Not Very Knowledgeable   |                                                                                                                   |                                                                                                                                                                                                                                                                                                |   |                          |   |                        |   |                        |   |                  |   |                       |
| 3  | Somewhat Knowledgeable   |                                                                                                                   |                                                                                                                                                                                                                                                                                                |   |                          |   |                        |   |                        |   |                  |   |                       |
| 4  | Knowledgeable            |                                                                                                                   |                                                                                                                                                                                                                                                                                                |   |                          |   |                        |   |                        |   |                  |   |                       |
| 5  | Very Knowledgeable       |                                                                                                                   |                                                                                                                                                                                                                                                                                                |   |                          |   |                        |   |                        |   |                  |   |                       |
| 50 | [views_1]                | Section Header: <i>How much do the following influence your views on Death with Dignity?</i><br>Political Beliefs | radio (Matrix) <table border="1"> <tr><td>1</td><td>Not at all Influential</td></tr> <tr><td>2</td><td>Slightly Influential</td></tr> <tr><td>3</td><td>Somewhat Influential</td></tr> <tr><td>4</td><td>Very Influential</td></tr> <tr><td>5</td><td>Extremely Influential</td></tr> </table> | 1 | Not at all Influential   | 2 | Slightly Influential   | 3 | Somewhat Influential   | 4 | Very Influential | 5 | Extremely Influential |
| 1  | Not at all Influential   |                                                                                                                   |                                                                                                                                                                                                                                                                                                |   |                          |   |                        |   |                        |   |                  |   |                       |
| 2  | Slightly Influential     |                                                                                                                   |                                                                                                                                                                                                                                                                                                |   |                          |   |                        |   |                        |   |                  |   |                       |
| 3  | Somewhat Influential     |                                                                                                                   |                                                                                                                                                                                                                                                                                                |   |                          |   |                        |   |                        |   |                  |   |                       |
| 4  | Very Influential         |                                                                                                                   |                                                                                                                                                                                                                                                                                                |   |                          |   |                        |   |                        |   |                  |   |                       |
| 5  | Extremely Influential    |                                                                                                                   |                                                                                                                                                                                                                                                                                                |   |                          |   |                        |   |                        |   |                  |   |                       |
| 51 | [views_2]                | Religious Beliefs                                                                                                 | radio (Matrix) <table border="1"> <tr><td>1</td><td>Not at all Influential</td></tr> <tr><td>2</td><td>Slightly Influential</td></tr> <tr><td>3</td><td>Somewhat Influential</td></tr> <tr><td>4</td><td>Very Influential</td></tr> <tr><td>5</td><td>Extremely Influential</td></tr> </table> | 1 | Not at all Influential   | 2 | Slightly Influential   | 3 | Somewhat Influential   | 4 | Very Influential | 5 | Extremely Influential |
| 1  | Not at all Influential   |                                                                                                                   |                                                                                                                                                                                                                                                                                                |   |                          |   |                        |   |                        |   |                  |   |                       |
| 2  | Slightly Influential     |                                                                                                                   |                                                                                                                                                                                                                                                                                                |   |                          |   |                        |   |                        |   |                  |   |                       |
| 3  | Somewhat Influential     |                                                                                                                   |                                                                                                                                                                                                                                                                                                |   |                          |   |                        |   |                        |   |                  |   |                       |
| 4  | Very Influential         |                                                                                                                   |                                                                                                                                                                                                                                                                                                |   |                          |   |                        |   |                        |   |                  |   |                       |
| 5  | Extremely Influential    |                                                                                                                   |                                                                                                                                                                                                                                                                                                |   |                          |   |                        |   |                        |   |                  |   |                       |
| 52 | [views_3]                | Individual Values                                                                                                 | radio (Matrix) <table border="1"> <tr><td>1</td><td>Not at all Influential</td></tr> <tr><td>2</td><td>Slightly Influential</td></tr> <tr><td>3</td><td>Somewhat Influential</td></tr> <tr><td>4</td><td>Very Influential</td></tr> <tr><td>5</td><td>Extremely Influential</td></tr> </table> | 1 | Not at all Influential   | 2 | Slightly Influential   | 3 | Somewhat Influential   | 4 | Very Influential | 5 | Extremely Influential |
| 1  | Not at all Influential   |                                                                                                                   |                                                                                                                                                                                                                                                                                                |   |                          |   |                        |   |                        |   |                  |   |                       |
| 2  | Slightly Influential     |                                                                                                                   |                                                                                                                                                                                                                                                                                                |   |                          |   |                        |   |                        |   |                  |   |                       |
| 3  | Somewhat Influential     |                                                                                                                   |                                                                                                                                                                                                                                                                                                |   |                          |   |                        |   |                        |   |                  |   |                       |
| 4  | Very Influential         |                                                                                                                   |                                                                                                                                                                                                                                                                                                |   |                          |   |                        |   |                        |   |                  |   |                       |
| 5  | Extremely Influential    |                                                                                                                   |                                                                                                                                                                                                                                                                                                |   |                          |   |                        |   |                        |   |                  |   |                       |
| 53 | [views_4]                | Family Values                                                                                                     | radio (Matrix) <table border="1"> <tr><td>1</td><td>Not at all Influential</td></tr> <tr><td>2</td><td>Slightly Influential</td></tr> <tr><td>3</td><td>Somewhat Influential</td></tr> <tr><td>4</td><td>Very Influential</td></tr> <tr><td>5</td><td>Extremely Influential</td></tr> </table> | 1 | Not at all Influential   | 2 | Slightly Influential   | 3 | Somewhat Influential   | 4 | Very Influential | 5 | Extremely Influential |
| 1  | Not at all Influential   |                                                                                                                   |                                                                                                                                                                                                                                                                                                |   |                          |   |                        |   |                        |   |                  |   |                       |
| 2  | Slightly Influential     |                                                                                                                   |                                                                                                                                                                                                                                                                                                |   |                          |   |                        |   |                        |   |                  |   |                       |
| 3  | Somewhat Influential     |                                                                                                                   |                                                                                                                                                                                                                                                                                                |   |                          |   |                        |   |                        |   |                  |   |                       |
| 4  | Very Influential         |                                                                                                                   |                                                                                                                                                                                                                                                                                                |   |                          |   |                        |   |                        |   |                  |   |                       |
| 5  | Extremely Influential    |                                                                                                                   |                                                                                                                                                                                                                                                                                                |   |                          |   |                        |   |                        |   |                  |   |                       |

|    |                            |                                                                                                                                                                                                                                                        |                                                                                                                                                                                                                                                                                                  |   |                        |   |                      |   |                      |   |                  |   |                       |   |              |
|----|----------------------------|--------------------------------------------------------------------------------------------------------------------------------------------------------------------------------------------------------------------------------------------------------|--------------------------------------------------------------------------------------------------------------------------------------------------------------------------------------------------------------------------------------------------------------------------------------------------|---|------------------------|---|----------------------|---|----------------------|---|------------------|---|-----------------------|---|--------------|
| 54 | [views_5]                  | Personal Experience                                                                                                                                                                                                                                    | radio (Matrix) <table border="1"> <tr><td>1</td><td>Not at all Influential</td></tr> <tr><td>2</td><td>Slightly Influential</td></tr> <tr><td>3</td><td>Somewhat Influential</td></tr> <tr><td>4</td><td>Very Influential</td></tr> <tr><td>5</td><td>Extremely Influential</td></tr> </table>   | 1 | Not at all Influential | 2 | Slightly Influential | 3 | Somewhat Influential | 4 | Very Influential | 5 | Extremely Influential |   |              |
| 1  | Not at all Influential     |                                                                                                                                                                                                                                                        |                                                                                                                                                                                                                                                                                                  |   |                        |   |                      |   |                      |   |                  |   |                       |   |              |
| 2  | Slightly Influential       |                                                                                                                                                                                                                                                        |                                                                                                                                                                                                                                                                                                  |   |                        |   |                      |   |                      |   |                  |   |                       |   |              |
| 3  | Somewhat Influential       |                                                                                                                                                                                                                                                        |                                                                                                                                                                                                                                                                                                  |   |                        |   |                      |   |                      |   |                  |   |                       |   |              |
| 4  | Very Influential           |                                                                                                                                                                                                                                                        |                                                                                                                                                                                                                                                                                                  |   |                        |   |                      |   |                      |   |                  |   |                       |   |              |
| 5  | Extremely Influential      |                                                                                                                                                                                                                                                        |                                                                                                                                                                                                                                                                                                  |   |                        |   |                      |   |                      |   |                  |   |                       |   |              |
| 55 | [views_6]                  | Professional Experience                                                                                                                                                                                                                                | radio (Matrix) <table border="1"> <tr><td>1</td><td>Not at all Influential</td></tr> <tr><td>2</td><td>Slightly Influential</td></tr> <tr><td>3</td><td>Somewhat Influential</td></tr> <tr><td>4</td><td>Very Influential</td></tr> <tr><td>5</td><td>Extremely Influential</td></tr> </table>   | 1 | Not at all Influential | 2 | Slightly Influential | 3 | Somewhat Influential | 4 | Very Influential | 5 | Extremely Influential |   |              |
| 1  | Not at all Influential     |                                                                                                                                                                                                                                                        |                                                                                                                                                                                                                                                                                                  |   |                        |   |                      |   |                      |   |                  |   |                       |   |              |
| 2  | Slightly Influential       |                                                                                                                                                                                                                                                        |                                                                                                                                                                                                                                                                                                  |   |                        |   |                      |   |                      |   |                  |   |                       |   |              |
| 3  | Somewhat Influential       |                                                                                                                                                                                                                                                        |                                                                                                                                                                                                                                                                                                  |   |                        |   |                      |   |                      |   |                  |   |                       |   |              |
| 4  | Very Influential           |                                                                                                                                                                                                                                                        |                                                                                                                                                                                                                                                                                                  |   |                        |   |                      |   |                      |   |                  |   |                       |   |              |
| 5  | Extremely Influential      |                                                                                                                                                                                                                                                        |                                                                                                                                                                                                                                                                                                  |   |                        |   |                      |   |                      |   |                  |   |                       |   |              |
| 56 | [views_7]                  | Educational Experience                                                                                                                                                                                                                                 | radio (Matrix) <table border="1"> <tr><td>1</td><td>Not at all Influential</td></tr> <tr><td>2</td><td>Slightly Influential</td></tr> <tr><td>3</td><td>Somewhat Influential</td></tr> <tr><td>4</td><td>Very Influential</td></tr> <tr><td>5</td><td>Extremely Influential</td></tr> </table>   | 1 | Not at all Influential | 2 | Slightly Influential | 3 | Somewhat Influential | 4 | Very Influential | 5 | Extremely Influential |   |              |
| 1  | Not at all Influential     |                                                                                                                                                                                                                                                        |                                                                                                                                                                                                                                                                                                  |   |                        |   |                      |   |                      |   |                  |   |                       |   |              |
| 2  | Slightly Influential       |                                                                                                                                                                                                                                                        |                                                                                                                                                                                                                                                                                                  |   |                        |   |                      |   |                      |   |                  |   |                       |   |              |
| 3  | Somewhat Influential       |                                                                                                                                                                                                                                                        |                                                                                                                                                                                                                                                                                                  |   |                        |   |                      |   |                      |   |                  |   |                       |   |              |
| 4  | Very Influential           |                                                                                                                                                                                                                                                        |                                                                                                                                                                                                                                                                                                  |   |                        |   |                      |   |                      |   |                  |   |                       |   |              |
| 5  | Extremely Influential      |                                                                                                                                                                                                                                                        |                                                                                                                                                                                                                                                                                                  |   |                        |   |                      |   |                      |   |                  |   |                       |   |              |
| 57 | [dwd_involvement_number]   | Section Header: <i>In this section, we'll ask you a few questions about your experience with patients who inquire about or request Death with Dignity</i><br>How many of your patient(s) have inquired or have you spoken to about Death with Dignity? | radio (Matrix) <table border="1"> <tr><td>1</td><td>None</td></tr> <tr><td>2</td><td>1-3 patients</td></tr> <tr><td>3</td><td>4-10 patients</td></tr> <tr><td>4</td><td>11-20 patients</td></tr> <tr><td>5</td><td>21-40 patients</td></tr> <tr><td>6</td><td>&gt;40 patients</td></tr> </table> | 1 | None                   | 2 | 1-3 patients         | 3 | 4-10 patients        | 4 | 11-20 patients   | 5 | 21-40 patients        | 6 | >40 patients |
| 1  | None                       |                                                                                                                                                                                                                                                        |                                                                                                                                                                                                                                                                                                  |   |                        |   |                      |   |                      |   |                  |   |                       |   |              |
| 2  | 1-3 patients               |                                                                                                                                                                                                                                                        |                                                                                                                                                                                                                                                                                                  |   |                        |   |                      |   |                      |   |                  |   |                       |   |              |
| 3  | 4-10 patients              |                                                                                                                                                                                                                                                        |                                                                                                                                                                                                                                                                                                  |   |                        |   |                      |   |                      |   |                  |   |                       |   |              |
| 4  | 11-20 patients             |                                                                                                                                                                                                                                                        |                                                                                                                                                                                                                                                                                                  |   |                        |   |                      |   |                      |   |                  |   |                       |   |              |
| 5  | 21-40 patients             |                                                                                                                                                                                                                                                        |                                                                                                                                                                                                                                                                                                  |   |                        |   |                      |   |                      |   |                  |   |                       |   |              |
| 6  | >40 patients               |                                                                                                                                                                                                                                                        |                                                                                                                                                                                                                                                                                                  |   |                        |   |                      |   |                      |   |                  |   |                       |   |              |
| 58 | [dwd_involvement_number_2] | How many of your patient(s) have pursued Death with Dignity?                                                                                                                                                                                           | radio (Matrix) <table border="1"> <tr><td>1</td><td>None</td></tr> <tr><td>2</td><td>1-3 patients</td></tr> <tr><td>3</td><td>4-10 patients</td></tr> <tr><td>4</td><td>11-20 patients</td></tr> <tr><td>5</td><td>21-40 patients</td></tr> <tr><td>6</td><td>&gt;40 patients</td></tr> </table> | 1 | None                   | 2 | 1-3 patients         | 3 | 4-10 patients        | 4 | 11-20 patients   | 5 | 21-40 patients        | 6 | >40 patients |
| 1  | None                       |                                                                                                                                                                                                                                                        |                                                                                                                                                                                                                                                                                                  |   |                        |   |                      |   |                      |   |                  |   |                       |   |              |
| 2  | 1-3 patients               |                                                                                                                                                                                                                                                        |                                                                                                                                                                                                                                                                                                  |   |                        |   |                      |   |                      |   |                  |   |                       |   |              |
| 3  | 4-10 patients              |                                                                                                                                                                                                                                                        |                                                                                                                                                                                                                                                                                                  |   |                        |   |                      |   |                      |   |                  |   |                       |   |              |
| 4  | 11-20 patients             |                                                                                                                                                                                                                                                        |                                                                                                                                                                                                                                                                                                  |   |                        |   |                      |   |                      |   |                  |   |                       |   |              |
| 5  | 21-40 patients             |                                                                                                                                                                                                                                                        |                                                                                                                                                                                                                                                                                                  |   |                        |   |                      |   |                      |   |                  |   |                       |   |              |
| 6  | >40 patients               |                                                                                                                                                                                                                                                        |                                                                                                                                                                                                                                                                                                  |   |                        |   |                      |   |                      |   |                  |   |                       |   |              |

|    |                                                                                                                                                                                                              |                                                                                                                                                                                                                                                                                                |                                                                                                                                                                                                                                                                                                                                                                                                                                                                                                                                                                                                                                                                                                                                                                                                                                                                                                            |   |                           |                            |    |                           |                   |   |                           |                   |   |                           |                                                   |   |                           |                                                      |   |                           |                                                 |   |                           |                                             |   |                           |                         |    |                            |       |
|----|--------------------------------------------------------------------------------------------------------------------------------------------------------------------------------------------------------------|------------------------------------------------------------------------------------------------------------------------------------------------------------------------------------------------------------------------------------------------------------------------------------------------|------------------------------------------------------------------------------------------------------------------------------------------------------------------------------------------------------------------------------------------------------------------------------------------------------------------------------------------------------------------------------------------------------------------------------------------------------------------------------------------------------------------------------------------------------------------------------------------------------------------------------------------------------------------------------------------------------------------------------------------------------------------------------------------------------------------------------------------------------------------------------------------------------------|---|---------------------------|----------------------------|----|---------------------------|-------------------|---|---------------------------|-------------------|---|---------------------------|---------------------------------------------------|---|---------------------------|------------------------------------------------------|---|---------------------------|-------------------------------------------------|---|---------------------------|---------------------------------------------|---|---------------------------|-------------------------|----|----------------------------|-------|
| 59 | <div>[ dwd_involvement_no_why ]</div> <div>Show the field ONLY if:<br/>[dwd_involvement_number_2] = '1'</div>                                                                                                | If you have yet to work with a patient pursuing Death with Dignity, why is that?Please select as many as applicable                                                                                                                                                                            | <div>checkbox</div> <table><tr><td>1</td><td>dwd_involvement_no_why__1</td><td>Personal morals and values</td></tr><tr><td>2</td><td>dwd_involvement_no_why__2</td><td>Religious Beliefs</td></tr><tr><td>3</td><td>dwd_involvement_no_why__3</td><td>Political Beliefs</td></tr><tr><td>4</td><td>dwd_involvement_no_why__4</td><td>Lack of knowledge with Death with Dignity process</td></tr><tr><td>5</td><td>dwd_involvement_no_why__5</td><td>Discomfort due to specifics of patient and/or family</td></tr><tr><td>6</td><td>dwd_involvement_no_why__6</td><td>Discomfort due to prior professional experience</td></tr><tr><td>7</td><td>dwd_involvement_no_why__7</td><td>Discomfort due to prior personal experience</td></tr><tr><td>8</td><td>dwd_involvement_no_why__8</td><td>No opportunity to do so</td></tr><tr><td>99</td><td>dwd_involvement_no_why__99</td><td>Other</td></tr></table> | 1 | dwd_involvement_no_why__1 | Personal morals and values | 2  | dwd_involvement_no_why__2 | Religious Beliefs | 3 | dwd_involvement_no_why__3 | Political Beliefs | 4 | dwd_involvement_no_why__4 | Lack of knowledge with Death with Dignity process | 5 | dwd_involvement_no_why__5 | Discomfort due to specifics of patient and/or family | 6 | dwd_involvement_no_why__6 | Discomfort due to prior professional experience | 7 | dwd_involvement_no_why__7 | Discomfort due to prior personal experience | 8 | dwd_involvement_no_why__8 | No opportunity to do so | 99 | dwd_involvement_no_why__99 | Other |
| 1  | dwd_involvement_no_why__1                                                                                                                                                                                    | Personal morals and values                                                                                                                                                                                                                                                                     |                                                                                                                                                                                                                                                                                                                                                                                                                                                                                                                                                                                                                                                                                                                                                                                                                                                                                                            |   |                           |                            |    |                           |                   |   |                           |                   |   |                           |                                                   |   |                           |                                                      |   |                           |                                                 |   |                           |                                             |   |                           |                         |    |                            |       |
| 2  | dwd_involvement_no_why__2                                                                                                                                                                                    | Religious Beliefs                                                                                                                                                                                                                                                                              |                                                                                                                                                                                                                                                                                                                                                                                                                                                                                                                                                                                                                                                                                                                                                                                                                                                                                                            |   |                           |                            |    |                           |                   |   |                           |                   |   |                           |                                                   |   |                           |                                                      |   |                           |                                                 |   |                           |                                             |   |                           |                         |    |                            |       |
| 3  | dwd_involvement_no_why__3                                                                                                                                                                                    | Political Beliefs                                                                                                                                                                                                                                                                              |                                                                                                                                                                                                                                                                                                                                                                                                                                                                                                                                                                                                                                                                                                                                                                                                                                                                                                            |   |                           |                            |    |                           |                   |   |                           |                   |   |                           |                                                   |   |                           |                                                      |   |                           |                                                 |   |                           |                                             |   |                           |                         |    |                            |       |
| 4  | dwd_involvement_no_why__4                                                                                                                                                                                    | Lack of knowledge with Death with Dignity process                                                                                                                                                                                                                                              |                                                                                                                                                                                                                                                                                                                                                                                                                                                                                                                                                                                                                                                                                                                                                                                                                                                                                                            |   |                           |                            |    |                           |                   |   |                           |                   |   |                           |                                                   |   |                           |                                                      |   |                           |                                                 |   |                           |                                             |   |                           |                         |    |                            |       |
| 5  | dwd_involvement_no_why__5                                                                                                                                                                                    | Discomfort due to specifics of patient and/or family                                                                                                                                                                                                                                           |                                                                                                                                                                                                                                                                                                                                                                                                                                                                                                                                                                                                                                                                                                                                                                                                                                                                                                            |   |                           |                            |    |                           |                   |   |                           |                   |   |                           |                                                   |   |                           |                                                      |   |                           |                                                 |   |                           |                                             |   |                           |                         |    |                            |       |
| 6  | dwd_involvement_no_why__6                                                                                                                                                                                    | Discomfort due to prior professional experience                                                                                                                                                                                                                                                |                                                                                                                                                                                                                                                                                                                                                                                                                                                                                                                                                                                                                                                                                                                                                                                                                                                                                                            |   |                           |                            |    |                           |                   |   |                           |                   |   |                           |                                                   |   |                           |                                                      |   |                           |                                                 |   |                           |                                             |   |                           |                         |    |                            |       |
| 7  | dwd_involvement_no_why__7                                                                                                                                                                                    | Discomfort due to prior personal experience                                                                                                                                                                                                                                                    |                                                                                                                                                                                                                                                                                                                                                                                                                                                                                                                                                                                                                                                                                                                                                                                                                                                                                                            |   |                           |                            |    |                           |                   |   |                           |                   |   |                           |                                                   |   |                           |                                                      |   |                           |                                                 |   |                           |                                             |   |                           |                         |    |                            |       |
| 8  | dwd_involvement_no_why__8                                                                                                                                                                                    | No opportunity to do so                                                                                                                                                                                                                                                                        |                                                                                                                                                                                                                                                                                                                                                                                                                                                                                                                                                                                                                                                                                                                                                                                                                                                                                                            |   |                           |                            |    |                           |                   |   |                           |                   |   |                           |                                                   |   |                           |                                                      |   |                           |                                                 |   |                           |                                             |   |                           |                         |    |                            |       |
| 99 | dwd_involvement_no_why__99                                                                                                                                                                                   | Other                                                                                                                                                                                                                                                                                          |                                                                                                                                                                                                                                                                                                                                                                                                                                                                                                                                                                                                                                                                                                                                                                                                                                                                                                            |   |                           |                            |    |                           |                   |   |                           |                   |   |                           |                                                   |   |                           |                                                      |   |                           |                                                 |   |                           |                                             |   |                           |                         |    |                            |       |
| 60 | <div>[ dwd_involvement_no_why_other ]</div> <div>Show the field ONLY if:<br/>[dwd_involvement_no_why(99)] = '1'</div>                                                                                        | If another reason, please specify:                                                                                                                                                                                                                                                             | text                                                                                                                                                                                                                                                                                                                                                                                                                                                                                                                                                                                                                                                                                                                                                                                                                                                                                                       |   |                           |                            |    |                           |                   |   |                           |                   |   |                           |                                                   |   |                           |                                                      |   |                           |                                                 |   |                           |                                             |   |                           |                         |    |                            |       |
| 61 | <div>[ dwd_yes_1 ]</div> <div>Show the field ONLY if:<br/>[dwd_involvement_number_2] = '3' OR [dwd_involvement_number_2] = '4' OR [dwd_involvement_number_2] = '5' OR [dwd_involvement_number_2] = '6'</div> | <div>Section Header: <i>In this section, we'll ask you a few questions about the pathways taken by patients who have requested Death with Dignity</i></div> <div>Have you ever been involved with a patient who requested the Death with Dignity process, but ended up being ineligible?</div> | <div>radio (Matrix)</div> <table><tr><td>1</td><td>Yes</td></tr><tr><td>0</td><td>No</td></tr></table>                                                                                                                                                                                                                                                                                                                                                                                                                                                                                                                                                                                                                                                                                                                                                                                                     | 1 | Yes                       | 0                          | No |                           |                   |   |                           |                   |   |                           |                                                   |   |                           |                                                      |   |                           |                                                 |   |                           |                                             |   |                           |                         |    |                            |       |
| 1  | Yes                                                                                                                                                                                                          |                                                                                                                                                                                                                                                                                                |                                                                                                                                                                                                                                                                                                                                                                                                                                                                                                                                                                                                                                                                                                                                                                                                                                                                                                            |   |                           |                            |    |                           |                   |   |                           |                   |   |                           |                                                   |   |                           |                                                      |   |                           |                                                 |   |                           |                                             |   |                           |                         |    |                            |       |
| 0  | No                                                                                                                                                                                                           |                                                                                                                                                                                                                                                                                                |                                                                                                                                                                                                                                                                                                                                                                                                                                                                                                                                                                                                                                                                                                                                                                                                                                                                                                            |   |                           |                            |    |                           |                   |   |                           |                   |   |                           |                                                   |   |                           |                                                      |   |                           |                                                 |   |                           |                                             |   |                           |                         |    |                            |       |
| 62 | <div>[ dwd_yes_2 ]</div> <div>Show the field ONLY if:<br/>[dwd_involvement_number_2] = '3' OR [dwd_involvement_number_2] = '4' OR [dwd_involvement_number_2] = '5' OR [dwd_involvement_number_2] = '6'</div> | Have you ever worked with a patient who requested the Death with Dignity process, but changed their mind about proceeding?                                                                                                                                                                     | <div>radio (Matrix)</div> <table><tr><td>1</td><td>Yes</td></tr><tr><td>0</td><td>No</td></tr></table>                                                                                                                                                                                                                                                                                                                                                                                                                                                                                                                                                                                                                                                                                                                                                                                                     | 1 | Yes                       | 0                          | No |                           |                   |   |                           |                   |   |                           |                                                   |   |                           |                                                      |   |                           |                                                 |   |                           |                                             |   |                           |                         |    |                            |       |
| 1  | Yes                                                                                                                                                                                                          |                                                                                                                                                                                                                                                                                                |                                                                                                                                                                                                                                                                                                                                                                                                                                                                                                                                                                                                                                                                                                                                                                                                                                                                                                            |   |                           |                            |    |                           |                   |   |                           |                   |   |                           |                                                   |   |                           |                                                      |   |                           |                                                 |   |                           |                                             |   |                           |                         |    |                            |       |
| 0  | No                                                                                                                                                                                                           |                                                                                                                                                                                                                                                                                                |                                                                                                                                                                                                                                                                                                                                                                                                                                                                                                                                                                                                                                                                                                                                                                                                                                                                                                            |   |                           |                            |    |                           |                   |   |                           |                   |   |                           |                                                   |   |                           |                                                      |   |                           |                                                 |   |                           |                                             |   |                           |                         |    |                            |       |
| 63 | <div>[ dwd_yes_3 ]</div> <div>Show the field ONLY if:<br/>[dwd_involvement_number_2] = '3' OR [dwd_involvement_number_2] = '4' OR [dwd_involvement_number_2] = '5' OR [dwd_involvement_number_2] = '6'</div> | Have you ever discussed Death with Dignity with a patient's family member or loved one?                                                                                                                                                                                                        | <div>radio (Matrix)</div> <table><tr><td>1</td><td>Yes</td></tr><tr><td>0</td><td>No</td></tr></table>                                                                                                                                                                                                                                                                                                                                                                                                                                                                                                                                                                                                                                                                                                                                                                                                     | 1 | Yes                       | 0                          | No |                           |                   |   |                           |                   |   |                           |                                                   |   |                           |                                                      |   |                           |                                                 |   |                           |                                             |   |                           |                         |    |                            |       |
| 1  | Yes                                                                                                                                                                                                          |                                                                                                                                                                                                                                                                                                |                                                                                                                                                                                                                                                                                                                                                                                                                                                                                                                                                                                                                                                                                                                                                                                                                                                                                                            |   |                           |                            |    |                           |                   |   |                           |                   |   |                           |                                                   |   |                           |                                                      |   |                           |                                                 |   |                           |                                             |   |                           |                         |    |                            |       |
| 0  | No                                                                                                                                                                                                           |                                                                                                                                                                                                                                                                                                |                                                                                                                                                                                                                                                                                                                                                                                                                                                                                                                                                                                                                                                                                                                                                                                                                                                                                                            |   |                           |                            |    |                           |                   |   |                           |                   |   |                           |                                                   |   |                           |                                                      |   |                           |                                                 |   |                           |                                             |   |                           |                         |    |                            |       |

|    |                                                                                                                                                                                                        |                                                                                                                                                                                                                                                                                    |                                                                                                                                                                                                                                                                                                                                                                                                                                                                                                                                                                             |   |               |                                 |                 |               |                                 |   |                 |                                 |               |               |                                               |   |               |                                                       |    |                |       |
|----|--------------------------------------------------------------------------------------------------------------------------------------------------------------------------------------------------------|------------------------------------------------------------------------------------------------------------------------------------------------------------------------------------------------------------------------------------------------------------------------------------|-----------------------------------------------------------------------------------------------------------------------------------------------------------------------------------------------------------------------------------------------------------------------------------------------------------------------------------------------------------------------------------------------------------------------------------------------------------------------------------------------------------------------------------------------------------------------------|---|---------------|---------------------------------|-----------------|---------------|---------------------------------|---|-----------------|---------------------------------|---------------|---------------|-----------------------------------------------|---|---------------|-------------------------------------------------------|----|----------------|-------|
| 64 | [ <b>dwd_yes_4</b> ]<br><br>Show the field ONLY if:<br>[dwd_involvement_number_2] = '3' OR [dwd_involvement_number_2] = '4' OR [dwd_involvement_number_2] = '5' OR [dwd_involvement_number_2] = '6'    | Have you ever worked with a Death with Dignity patient who acquired the medication?                                                                                                                                                                                                | radio (Matrix)<br><table border="1"> <tr> <td>1</td> <td>Yes</td> </tr> <tr> <td>0</td> <td>No</td> </tr> </table>                                                                                                                                                                                                                                                                                                                                                                                                                                                          | 1 | Yes           | 0                               | No              |               |                                 |   |                 |                                 |               |               |                                               |   |               |                                                       |    |                |       |
| 1  | Yes                                                                                                                                                                                                    |                                                                                                                                                                                                                                                                                    |                                                                                                                                                                                                                                                                                                                                                                                                                                                                                                                                                                             |   |               |                                 |                 |               |                                 |   |                 |                                 |               |               |                                               |   |               |                                                       |    |                |       |
| 0  | No                                                                                                                                                                                                     |                                                                                                                                                                                                                                                                                    |                                                                                                                                                                                                                                                                                                                                                                                                                                                                                                                                                                             |   |               |                                 |                 |               |                                 |   |                 |                                 |               |               |                                               |   |               |                                                       |    |                |       |
| 65 | [ <b>dwd_yes_5</b> ]<br><br>Show the field ONLY if:<br>[dwd_involvement_number_2] = '3' OR [dwd_involvement_number_2] = '4' OR [dwd_involvement_number_2] = '5' OR [dwd_involvement_number_2] = '6'    | Have you ever worked with a Death with Dignity patient who ingested the medication to end their life?                                                                                                                                                                              | radio (Matrix)<br><table border="1"> <tr> <td>1</td> <td>Yes</td> </tr> <tr> <td>0</td> <td>No</td> </tr> </table>                                                                                                                                                                                                                                                                                                                                                                                                                                                          | 1 | Yes           | 0                               | No              |               |                                 |   |                 |                                 |               |               |                                               |   |               |                                                       |    |                |       |
| 1  | Yes                                                                                                                                                                                                    |                                                                                                                                                                                                                                                                                    |                                                                                                                                                                                                                                                                                                                                                                                                                                                                                                                                                                             |   |               |                                 |                 |               |                                 |   |                 |                                 |               |               |                                               |   |               |                                                       |    |                |       |
| 0  | No                                                                                                                                                                                                     |                                                                                                                                                                                                                                                                                    |                                                                                                                                                                                                                                                                                                                                                                                                                                                                                                                                                                             |   |               |                                 |                 |               |                                 |   |                 |                                 |               |               |                                               |   |               |                                                       |    |                |       |
| 66 | [ <b>ineligible</b> ]<br><br>Show the field ONLY if:<br>[dwd_yes_1] = '1'                                                                                                                              | If you've had a patient(s) who pursued Death with Dignity but became ineligible, choose all that apply: If you've had more than one Death with Dignity ineligible patient, please choose as many as applicable across all Death with Dignity patients you've worked with           | checkbox<br><table border="1"> <tr> <td>1</td> <td>ineligible__1</td> <td>Too Sick/Progressed Disease</td> </tr> <tr> <td>2</td> <td>ineligible__2</td> <td>Absorption Issues</td> </tr> <tr> <td>3</td> <td>ineligible__3</td> <td>Mental Competency</td> </tr> <tr> <td>4</td> <td>ineligible__4</td> <td>Inability to Self-Administer</td> </tr> <tr> <td>5</td> <td>ineligible__5</td> <td>Cost of Medication</td> </tr> <tr> <td>88</td> <td>ineligible__88</td> <td>Other</td> </tr> </table>                                                                         | 1 | ineligible__1 | Too Sick/Progressed Disease     | 2               | ineligible__2 | Absorption Issues               | 3 | ineligible__3   | Mental Competency               | 4             | ineligible__4 | Inability to Self-Administer                  | 5 | ineligible__5 | Cost of Medication                                    | 88 | ineligible__88 | Other |
| 1  | ineligible__1                                                                                                                                                                                          | Too Sick/Progressed Disease                                                                                                                                                                                                                                                        |                                                                                                                                                                                                                                                                                                                                                                                                                                                                                                                                                                             |   |               |                                 |                 |               |                                 |   |                 |                                 |               |               |                                               |   |               |                                                       |    |                |       |
| 2  | ineligible__2                                                                                                                                                                                          | Absorption Issues                                                                                                                                                                                                                                                                  |                                                                                                                                                                                                                                                                                                                                                                                                                                                                                                                                                                             |   |               |                                 |                 |               |                                 |   |                 |                                 |               |               |                                               |   |               |                                                       |    |                |       |
| 3  | ineligible__3                                                                                                                                                                                          | Mental Competency                                                                                                                                                                                                                                                                  |                                                                                                                                                                                                                                                                                                                                                                                                                                                                                                                                                                             |   |               |                                 |                 |               |                                 |   |                 |                                 |               |               |                                               |   |               |                                                       |    |                |       |
| 4  | ineligible__4                                                                                                                                                                                          | Inability to Self-Administer                                                                                                                                                                                                                                                       |                                                                                                                                                                                                                                                                                                                                                                                                                                                                                                                                                                             |   |               |                                 |                 |               |                                 |   |                 |                                 |               |               |                                               |   |               |                                                       |    |                |       |
| 5  | ineligible__5                                                                                                                                                                                          | Cost of Medication                                                                                                                                                                                                                                                                 |                                                                                                                                                                                                                                                                                                                                                                                                                                                                                                                                                                             |   |               |                                 |                 |               |                                 |   |                 |                                 |               |               |                                               |   |               |                                                       |    |                |       |
| 88 | ineligible__88                                                                                                                                                                                         | Other                                                                                                                                                                                                                                                                              |                                                                                                                                                                                                                                                                                                                                                                                                                                                                                                                                                                             |   |               |                                 |                 |               |                                 |   |                 |                                 |               |               |                                               |   |               |                                                       |    |                |       |
| 67 | [ <b>ineligible_other</b> ]<br><br>Show the field ONLY if:<br>[ineligible(88)] = '1'                                                                                                                   | If the patient became ineligible for another reason, please specify:                                                                                                                                                                                                               | text                                                                                                                                                                                                                                                                                                                                                                                                                                                                                                                                                                        |   |               |                                 |                 |               |                                 |   |                 |                                 |               |               |                                               |   |               |                                                       |    |                |       |
| 68 | [ <b>declined</b> ]<br><br>Show the field ONLY if:<br>[dwd_yes_2] = '1'                                                                                                                                | If you've had a patient(s) who pursued Death with Dignity but declined proceeding, choose all apply: If you've had more than one Death with Dignity patient who declined proceeding, please choose as many as applicable across all Death with Dignity patients you've worked with | checkbox<br><table border="1"> <tr> <td>1</td> <td>declined__1</td> <td>Cost of or access to medication</td> </tr> <tr> <td>2</td> <td>declined__2</td> <td>Patient reassessed their values</td> </tr> <tr> <td>3</td> <td>declined__3</td> <td>Patient not supported by family</td> </tr> <tr> <td>4</td> <td>declined__4</td> <td>Patient concerned of stigma on self or family</td> </tr> <tr> <td>5</td> <td>declined__5</td> <td>Pursued other options (e.g. palliative care, hospice)</td> </tr> <tr> <td>88</td> <td>declined__88</td> <td>Other</td> </tr> </table> | 1 | declined__1   | Cost of or access to medication | 2               | declined__2   | Patient reassessed their values | 3 | declined__3     | Patient not supported by family | 4             | declined__4   | Patient concerned of stigma on self or family | 5 | declined__5   | Pursued other options (e.g. palliative care, hospice) | 88 | declined__88   | Other |
| 1  | declined__1                                                                                                                                                                                            | Cost of or access to medication                                                                                                                                                                                                                                                    |                                                                                                                                                                                                                                                                                                                                                                                                                                                                                                                                                                             |   |               |                                 |                 |               |                                 |   |                 |                                 |               |               |                                               |   |               |                                                       |    |                |       |
| 2  | declined__2                                                                                                                                                                                            | Patient reassessed their values                                                                                                                                                                                                                                                    |                                                                                                                                                                                                                                                                                                                                                                                                                                                                                                                                                                             |   |               |                                 |                 |               |                                 |   |                 |                                 |               |               |                                               |   |               |                                                       |    |                |       |
| 3  | declined__3                                                                                                                                                                                            | Patient not supported by family                                                                                                                                                                                                                                                    |                                                                                                                                                                                                                                                                                                                                                                                                                                                                                                                                                                             |   |               |                                 |                 |               |                                 |   |                 |                                 |               |               |                                               |   |               |                                                       |    |                |       |
| 4  | declined__4                                                                                                                                                                                            | Patient concerned of stigma on self or family                                                                                                                                                                                                                                      |                                                                                                                                                                                                                                                                                                                                                                                                                                                                                                                                                                             |   |               |                                 |                 |               |                                 |   |                 |                                 |               |               |                                               |   |               |                                                       |    |                |       |
| 5  | declined__5                                                                                                                                                                                            | Pursued other options (e.g. palliative care, hospice)                                                                                                                                                                                                                              |                                                                                                                                                                                                                                                                                                                                                                                                                                                                                                                                                                             |   |               |                                 |                 |               |                                 |   |                 |                                 |               |               |                                               |   |               |                                                       |    |                |       |
| 88 | declined__88                                                                                                                                                                                           | Other                                                                                                                                                                                                                                                                              |                                                                                                                                                                                                                                                                                                                                                                                                                                                                                                                                                                             |   |               |                                 |                 |               |                                 |   |                 |                                 |               |               |                                               |   |               |                                                       |    |                |       |
| 69 | [ <b>declined_other</b> ]<br><br>Show the field ONLY if:<br>[declined(88)] = '1'                                                                                                                       | If the patient declined proceeding for another reason, please specify:                                                                                                                                                                                                             | text                                                                                                                                                                                                                                                                                                                                                                                                                                                                                                                                                                        |   |               |                                 |                 |               |                                 |   |                 |                                 |               |               |                                               |   |               |                                                       |    |                |       |
| 70 | [ <b>experience_1</b> ]<br><br>Show the field ONLY if:<br>[dwd_involvement_number_2] = '3' OR [dwd_involvement_number_2] = '4' OR [dwd_involvement_number_2] = '5' OR [dwd_involvement_number_2] = '6' | How have your relationships with patients been affected by their pursuit of Death with Dignity?                                                                                                                                                                                    | radio<br><table border="1"> <tr> <td>1</td> <td>Very Positive</td> </tr> <tr> <td>2</td> <td>Mostly Positive</td> </tr> <tr> <td>3</td> <td>Neutral</td> </tr> <tr> <td>4</td> <td>Mostly Negative</td> </tr> <tr> <td>5</td> <td>Very Negative</td> </tr> <tr> <td>6</td> <td>Varied, depends on the case</td> </tr> </table>                                                                                                                                                                                                                                              | 1 | Very Positive | 2                               | Mostly Positive | 3             | Neutral                         | 4 | Mostly Negative | 5                               | Very Negative | 6             | Varied, depends on the case                   |   |               |                                                       |    |                |       |
| 1  | Very Positive                                                                                                                                                                                          |                                                                                                                                                                                                                                                                                    |                                                                                                                                                                                                                                                                                                                                                                                                                                                                                                                                                                             |   |               |                                 |                 |               |                                 |   |                 |                                 |               |               |                                               |   |               |                                                       |    |                |       |
| 2  | Mostly Positive                                                                                                                                                                                        |                                                                                                                                                                                                                                                                                    |                                                                                                                                                                                                                                                                                                                                                                                                                                                                                                                                                                             |   |               |                                 |                 |               |                                 |   |                 |                                 |               |               |                                               |   |               |                                                       |    |                |       |
| 3  | Neutral                                                                                                                                                                                                |                                                                                                                                                                                                                                                                                    |                                                                                                                                                                                                                                                                                                                                                                                                                                                                                                                                                                             |   |               |                                 |                 |               |                                 |   |                 |                                 |               |               |                                               |   |               |                                                       |    |                |       |
| 4  | Mostly Negative                                                                                                                                                                                        |                                                                                                                                                                                                                                                                                    |                                                                                                                                                                                                                                                                                                                                                                                                                                                                                                                                                                             |   |               |                                 |                 |               |                                 |   |                 |                                 |               |               |                                               |   |               |                                                       |    |                |       |
| 5  | Very Negative                                                                                                                                                                                          |                                                                                                                                                                                                                                                                                    |                                                                                                                                                                                                                                                                                                                                                                                                                                                                                                                                                                             |   |               |                                 |                 |               |                                 |   |                 |                                 |               |               |                                               |   |               |                                                       |    |                |       |
| 6  | Varied, depends on the case                                                                                                                                                                            |                                                                                                                                                                                                                                                                                    |                                                                                                                                                                                                                                                                                                                                                                                                                                                                                                                                                                             |   |               |                                 |                 |               |                                 |   |                 |                                 |               |               |                                               |   |               |                                                       |    |                |       |
| 71 | [ <b>experience_4</b> ]<br><br>Show the field ONLY if:<br>[dwd_involvement_number_2] = '3' OR [dwd_involvement_number_2] = '4' OR [dwd_involvement_number_2] = '5' OR [dwd_involvement_number_2] = '6' | How have your relationships with patient's family members been affected by the patient's pursuit of Death with Dignity?                                                                                                                                                            | radio<br><table border="1"> <tr> <td>1</td> <td>Very Positive</td> </tr> <tr> <td>2</td> <td>Mostly Positive</td> </tr> <tr> <td>3</td> <td>Neutral</td> </tr> <tr> <td>4</td> <td>Mostly Negative</td> </tr> <tr> <td>5</td> <td>Very Negative</td> </tr> <tr> <td>6</td> <td>Varied, depends on the case</td> </tr> </table>                                                                                                                                                                                                                                              | 1 | Very Positive | 2                               | Mostly Positive | 3             | Neutral                         | 4 | Mostly Negative | 5                               | Very Negative | 6             | Varied, depends on the case                   |   |               |                                                       |    |                |       |
| 1  | Very Positive                                                                                                                                                                                          |                                                                                                                                                                                                                                                                                    |                                                                                                                                                                                                                                                                                                                                                                                                                                                                                                                                                                             |   |               |                                 |                 |               |                                 |   |                 |                                 |               |               |                                               |   |               |                                                       |    |                |       |
| 2  | Mostly Positive                                                                                                                                                                                        |                                                                                                                                                                                                                                                                                    |                                                                                                                                                                                                                                                                                                                                                                                                                                                                                                                                                                             |   |               |                                 |                 |               |                                 |   |                 |                                 |               |               |                                               |   |               |                                                       |    |                |       |
| 3  | Neutral                                                                                                                                                                                                |                                                                                                                                                                                                                                                                                    |                                                                                                                                                                                                                                                                                                                                                                                                                                                                                                                                                                             |   |               |                                 |                 |               |                                 |   |                 |                                 |               |               |                                               |   |               |                                                       |    |                |       |
| 4  | Mostly Negative                                                                                                                                                                                        |                                                                                                                                                                                                                                                                                    |                                                                                                                                                                                                                                                                                                                                                                                                                                                                                                                                                                             |   |               |                                 |                 |               |                                 |   |                 |                                 |               |               |                                               |   |               |                                                       |    |                |       |
| 5  | Very Negative                                                                                                                                                                                          |                                                                                                                                                                                                                                                                                    |                                                                                                                                                                                                                                                                                                                                                                                                                                                                                                                                                                             |   |               |                                 |                 |               |                                 |   |                 |                                 |               |               |                                               |   |               |                                                       |    |                |       |
| 6  | Varied, depends on the case                                                                                                                                                                            |                                                                                                                                                                                                                                                                                    |                                                                                                                                                                                                                                                                                                                                                                                                                                                                                                                                                                             |   |               |                                 |                 |               |                                 |   |                 |                                 |               |               |                                               |   |               |                                                       |    |                |       |

|                                                                                                                                                       |                                                                                                                                                                                                             |                                                                                                                                                                         |                                                                                                                                                                                                                                                                                                              |   |                   |   |                 |   |          |   |                 |   |                |   |                             |
|-------------------------------------------------------------------------------------------------------------------------------------------------------|-------------------------------------------------------------------------------------------------------------------------------------------------------------------------------------------------------------|-------------------------------------------------------------------------------------------------------------------------------------------------------------------------|--------------------------------------------------------------------------------------------------------------------------------------------------------------------------------------------------------------------------------------------------------------------------------------------------------------|---|-------------------|---|-----------------|---|----------|---|-----------------|---|----------------|---|-----------------------------|
| 72                                                                                                                                                    | [ <a href="#">experience_2</a> ]<br>Show the field ONLY if:<br>[dwd_involvement_number_2] = '3' OR [dwd_involvement_number_2] = '4' OR [dwd_involvement_number_2] = '5' OR [dwd_involvement_number_2] = '6' | How has your relationships with fellow APP's been affected by your involvement in the Death with Dignity process?                                                       | radio<br><table border="1"> <tr><td>1</td><td>Very Positive</td></tr> <tr><td>2</td><td>Mostly Positive</td></tr> <tr><td>3</td><td>Neutral</td></tr> <tr><td>4</td><td>Mostly Negative</td></tr> <tr><td>5</td><td>Very Negative</td></tr> <tr><td>6</td><td>Varied, depends on the case</td></tr> </table> | 1 | Very Positive     | 2 | Mostly Positive | 3 | Neutral  | 4 | Mostly Negative | 5 | Very Negative  | 6 | Varied, depends on the case |
| 1                                                                                                                                                     | Very Positive                                                                                                                                                                                               |                                                                                                                                                                         |                                                                                                                                                                                                                                                                                                              |   |                   |   |                 |   |          |   |                 |   |                |   |                             |
| 2                                                                                                                                                     | Mostly Positive                                                                                                                                                                                             |                                                                                                                                                                         |                                                                                                                                                                                                                                                                                                              |   |                   |   |                 |   |          |   |                 |   |                |   |                             |
| 3                                                                                                                                                     | Neutral                                                                                                                                                                                                     |                                                                                                                                                                         |                                                                                                                                                                                                                                                                                                              |   |                   |   |                 |   |          |   |                 |   |                |   |                             |
| 4                                                                                                                                                     | Mostly Negative                                                                                                                                                                                             |                                                                                                                                                                         |                                                                                                                                                                                                                                                                                                              |   |                   |   |                 |   |          |   |                 |   |                |   |                             |
| 5                                                                                                                                                     | Very Negative                                                                                                                                                                                               |                                                                                                                                                                         |                                                                                                                                                                                                                                                                                                              |   |                   |   |                 |   |          |   |                 |   |                |   |                             |
| 6                                                                                                                                                     | Varied, depends on the case                                                                                                                                                                                 |                                                                                                                                                                         |                                                                                                                                                                                                                                                                                                              |   |                   |   |                 |   |          |   |                 |   |                |   |                             |
| 73                                                                                                                                                    | [ <a href="#">experience_3</a> ]<br>Show the field ONLY if:<br>[dwd_involvement_number_2] = '3' OR [dwd_involvement_number_2] = '4' OR [dwd_involvement_number_2] = '5' OR [dwd_involvement_number_2] = '6' | How has your relationships with attendings been affected by your involvement in the Death with Dignity process?                                                         | radio<br><table border="1"> <tr><td>1</td><td>Very Positive</td></tr> <tr><td>2</td><td>Mostly Positive</td></tr> <tr><td>3</td><td>Neutral</td></tr> <tr><td>4</td><td>Mostly Negative</td></tr> <tr><td>5</td><td>Very Negative</td></tr> <tr><td>6</td><td>Varied, depends on the case</td></tr> </table> | 1 | Very Positive     | 2 | Mostly Positive | 3 | Neutral  | 4 | Mostly Negative | 5 | Very Negative  | 6 | Varied, depends on the case |
| 1                                                                                                                                                     | Very Positive                                                                                                                                                                                               |                                                                                                                                                                         |                                                                                                                                                                                                                                                                                                              |   |                   |   |                 |   |          |   |                 |   |                |   |                             |
| 2                                                                                                                                                     | Mostly Positive                                                                                                                                                                                             |                                                                                                                                                                         |                                                                                                                                                                                                                                                                                                              |   |                   |   |                 |   |          |   |                 |   |                |   |                             |
| 3                                                                                                                                                     | Neutral                                                                                                                                                                                                     |                                                                                                                                                                         |                                                                                                                                                                                                                                                                                                              |   |                   |   |                 |   |          |   |                 |   |                |   |                             |
| 4                                                                                                                                                     | Mostly Negative                                                                                                                                                                                             |                                                                                                                                                                         |                                                                                                                                                                                                                                                                                                              |   |                   |   |                 |   |          |   |                 |   |                |   |                             |
| 5                                                                                                                                                     | Very Negative                                                                                                                                                                                               |                                                                                                                                                                         |                                                                                                                                                                                                                                                                                                              |   |                   |   |                 |   |          |   |                 |   |                |   |                             |
| 6                                                                                                                                                     | Varied, depends on the case                                                                                                                                                                                 |                                                                                                                                                                         |                                                                                                                                                                                                                                                                                                              |   |                   |   |                 |   |          |   |                 |   |                |   |                             |
| 74                                                                                                                                                    | [ <a href="#">maidquestions_complete</a> ]                                                                                                                                                                  | Section Header: <i>Form Status</i><br>Complete?                                                                                                                         | dropdown<br><table border="1"> <tr><td>0</td><td>Incomplete</td></tr> <tr><td>1</td><td>Unverified</td></tr> <tr><td>2</td><td>Complete</td></tr> </table>                                                                                                                                                   | 0 | Incomplete        | 1 | Unverified      | 2 | Complete |   |                 |   |                |   |                             |
| 0                                                                                                                                                     | Incomplete                                                                                                                                                                                                  |                                                                                                                                                                         |                                                                                                                                                                                                                                                                                                              |   |                   |   |                 |   |          |   |                 |   |                |   |                             |
| 1                                                                                                                                                     | Unverified                                                                                                                                                                                                  |                                                                                                                                                                         |                                                                                                                                                                                                                                                                                                              |   |                   |   |                 |   |          |   |                 |   |                |   |                             |
| 2                                                                                                                                                     | Complete                                                                                                                                                                                                    |                                                                                                                                                                         |                                                                                                                                                                                                                                                                                                              |   |                   |   |                 |   |          |   |                 |   |                |   |                             |
| Instrument: <b>Healthcare</b> (healthcare) 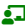 <b>Enabled as survey</b> |                                                                                                                                                                                                             |                                                                                                                                                                         |                                                                                                                                                                                                                                                                                                              |   |                   |   |                 |   |          |   |                 |   |                |   |                             |
| 75                                                                                                                                                    | [ <a href="#">dwd_legal_1</a> ]                                                                                                                                                                             | Section Header: <i>In this section, we are curious about your perceptions on the legality of Death with Dignity</i><br>Do you think Death with Dignity should be legal? | radio (Matrix)<br><table border="1"> <tr><td>1</td><td>Strongly Disagree</td></tr> <tr><td>2</td><td>Disagree</td></tr> <tr><td>3</td><td>Neutral</td></tr> <tr><td>4</td><td>Agree</td></tr> <tr><td>5</td><td>Strongly Agree</td></tr> </table>                                                            | 1 | Strongly Disagree | 2 | Disagree        | 3 | Neutral  | 4 | Agree           | 5 | Strongly Agree |   |                             |
| 1                                                                                                                                                     | Strongly Disagree                                                                                                                                                                                           |                                                                                                                                                                         |                                                                                                                                                                                                                                                                                                              |   |                   |   |                 |   |          |   |                 |   |                |   |                             |
| 2                                                                                                                                                     | Disagree                                                                                                                                                                                                    |                                                                                                                                                                         |                                                                                                                                                                                                                                                                                                              |   |                   |   |                 |   |          |   |                 |   |                |   |                             |
| 3                                                                                                                                                     | Neutral                                                                                                                                                                                                     |                                                                                                                                                                         |                                                                                                                                                                                                                                                                                                              |   |                   |   |                 |   |          |   |                 |   |                |   |                             |
| 4                                                                                                                                                     | Agree                                                                                                                                                                                                       |                                                                                                                                                                         |                                                                                                                                                                                                                                                                                                              |   |                   |   |                 |   |          |   |                 |   |                |   |                             |
| 5                                                                                                                                                     | Strongly Agree                                                                                                                                                                                              |                                                                                                                                                                         |                                                                                                                                                                                                                                                                                                              |   |                   |   |                 |   |          |   |                 |   |                |   |                             |
| 76                                                                                                                                                    | [ <a href="#">dwd_legal_2</a> ]                                                                                                                                                                             | Do you think advanced practice providers should be able to act as a consulting clinician for Death with Dignity?                                                        | radio (Matrix)<br><table border="1"> <tr><td>1</td><td>Strongly Disagree</td></tr> <tr><td>2</td><td>Disagree</td></tr> <tr><td>3</td><td>Neutral</td></tr> <tr><td>4</td><td>Agree</td></tr> <tr><td>5</td><td>Strongly Agree</td></tr> </table>                                                            | 1 | Strongly Disagree | 2 | Disagree        | 3 | Neutral  | 4 | Agree           | 5 | Strongly Agree |   |                             |
| 1                                                                                                                                                     | Strongly Disagree                                                                                                                                                                                           |                                                                                                                                                                         |                                                                                                                                                                                                                                                                                                              |   |                   |   |                 |   |          |   |                 |   |                |   |                             |
| 2                                                                                                                                                     | Disagree                                                                                                                                                                                                    |                                                                                                                                                                         |                                                                                                                                                                                                                                                                                                              |   |                   |   |                 |   |          |   |                 |   |                |   |                             |
| 3                                                                                                                                                     | Neutral                                                                                                                                                                                                     |                                                                                                                                                                         |                                                                                                                                                                                                                                                                                                              |   |                   |   |                 |   |          |   |                 |   |                |   |                             |
| 4                                                                                                                                                     | Agree                                                                                                                                                                                                       |                                                                                                                                                                         |                                                                                                                                                                                                                                                                                                              |   |                   |   |                 |   |          |   |                 |   |                |   |                             |
| 5                                                                                                                                                     | Strongly Agree                                                                                                                                                                                              |                                                                                                                                                                         |                                                                                                                                                                                                                                                                                                              |   |                   |   |                 |   |          |   |                 |   |                |   |                             |
| 77                                                                                                                                                    | [ <a href="#">dwd_legal_3</a> ]                                                                                                                                                                             | Do you think advanced practice providers should be able to act as an attending/prescribing clinician for Death with Dignity?                                            | radio (Matrix)<br><table border="1"> <tr><td>1</td><td>Strongly Disagree</td></tr> <tr><td>2</td><td>Disagree</td></tr> <tr><td>3</td><td>Neutral</td></tr> <tr><td>4</td><td>Agree</td></tr> <tr><td>5</td><td>Strongly Agree</td></tr> </table>                                                            | 1 | Strongly Disagree | 2 | Disagree        | 3 | Neutral  | 4 | Agree           | 5 | Strongly Agree |   |                             |
| 1                                                                                                                                                     | Strongly Disagree                                                                                                                                                                                           |                                                                                                                                                                         |                                                                                                                                                                                                                                                                                                              |   |                   |   |                 |   |          |   |                 |   |                |   |                             |
| 2                                                                                                                                                     | Disagree                                                                                                                                                                                                    |                                                                                                                                                                         |                                                                                                                                                                                                                                                                                                              |   |                   |   |                 |   |          |   |                 |   |                |   |                             |
| 3                                                                                                                                                     | Neutral                                                                                                                                                                                                     |                                                                                                                                                                         |                                                                                                                                                                                                                                                                                                              |   |                   |   |                 |   |          |   |                 |   |                |   |                             |
| 4                                                                                                                                                     | Agree                                                                                                                                                                                                       |                                                                                                                                                                         |                                                                                                                                                                                                                                                                                                              |   |                   |   |                 |   |          |   |                 |   |                |   |                             |
| 5                                                                                                                                                     | Strongly Agree                                                                                                                                                                                              |                                                                                                                                                                         |                                                                                                                                                                                                                                                                                                              |   |                   |   |                 |   |          |   |                 |   |                |   |                             |
| 78                                                                                                                                                    | [ <a href="#">dwd_option_1</a> ]                                                                                                                                                                            | Do you think Death with Dignity should be introduced by providers as option for patients with terminal illness?                                                         | radio (Matrix)<br><table border="1"> <tr><td>1</td><td>Strongly Disagree</td></tr> <tr><td>2</td><td>Disagree</td></tr> <tr><td>3</td><td>Neutral</td></tr> <tr><td>4</td><td>Agree</td></tr> <tr><td>5</td><td>Strongly Agree</td></tr> </table>                                                            | 1 | Strongly Disagree | 2 | Disagree        | 3 | Neutral  | 4 | Agree           | 5 | Strongly Agree |   |                             |
| 1                                                                                                                                                     | Strongly Disagree                                                                                                                                                                                           |                                                                                                                                                                         |                                                                                                                                                                                                                                                                                                              |   |                   |   |                 |   |          |   |                 |   |                |   |                             |
| 2                                                                                                                                                     | Disagree                                                                                                                                                                                                    |                                                                                                                                                                         |                                                                                                                                                                                                                                                                                                              |   |                   |   |                 |   |          |   |                 |   |                |   |                             |
| 3                                                                                                                                                     | Neutral                                                                                                                                                                                                     |                                                                                                                                                                         |                                                                                                                                                                                                                                                                                                              |   |                   |   |                 |   |          |   |                 |   |                |   |                             |
| 4                                                                                                                                                     | Agree                                                                                                                                                                                                       |                                                                                                                                                                         |                                                                                                                                                                                                                                                                                                              |   |                   |   |                 |   |          |   |                 |   |                |   |                             |
| 5                                                                                                                                                     | Strongly Agree                                                                                                                                                                                              |                                                                                                                                                                         |                                                                                                                                                                                                                                                                                                              |   |                   |   |                 |   |          |   |                 |   |                |   |                             |

|    |                                                                                        |                                                                                                                        |                                                                                                                                                                                                                                                                                                                                                                                                                          |   |            |   |            |   |          |   |           |   |           |   |            |   |            |   |          |   |          |    |        |
|----|----------------------------------------------------------------------------------------|------------------------------------------------------------------------------------------------------------------------|--------------------------------------------------------------------------------------------------------------------------------------------------------------------------------------------------------------------------------------------------------------------------------------------------------------------------------------------------------------------------------------------------------------------------|---|------------|---|------------|---|----------|---|-----------|---|-----------|---|------------|---|------------|---|----------|---|----------|----|--------|
| 79 | [dwd_legal_length]                                                                     | What should the waiting period be to receive the medications?                                                          | radio <table><tr><td>1</td><td>None</td></tr><tr><td>2</td><td>24 hours</td></tr><tr><td>3</td><td>72 hours</td></tr><tr><td>4</td><td>7 days</td></tr><tr><td>5</td><td>14 days</td></tr><tr><td>6</td><td>&gt;= 21 days</td></tr><tr><td>7</td><td>Unsure</td></tr></table>                                                                                                                                            | 1 | None       | 2 | 24 hours   | 3 | 72 hours | 4 | 7 days    | 5 | 14 days   | 6 | >= 21 days | 7 | Unsure     |   |          |   |          |    |        |
| 1  | None                                                                                   |                                                                                                                        |                                                                                                                                                                                                                                                                                                                                                                                                                          |   |            |   |            |   |          |   |           |   |           |   |            |   |            |   |          |   |          |    |        |
| 2  | 24 hours                                                                               |                                                                                                                        |                                                                                                                                                                                                                                                                                                                                                                                                                          |   |            |   |            |   |          |   |           |   |           |   |            |   |            |   |          |   |          |    |        |
| 3  | 72 hours                                                                               |                                                                                                                        |                                                                                                                                                                                                                                                                                                                                                                                                                          |   |            |   |            |   |          |   |           |   |           |   |            |   |            |   |          |   |          |    |        |
| 4  | 7 days                                                                                 |                                                                                                                        |                                                                                                                                                                                                                                                                                                                                                                                                                          |   |            |   |            |   |          |   |           |   |           |   |            |   |            |   |          |   |          |    |        |
| 5  | 14 days                                                                                |                                                                                                                        |                                                                                                                                                                                                                                                                                                                                                                                                                          |   |            |   |            |   |          |   |           |   |           |   |            |   |            |   |          |   |          |    |        |
| 6  | >= 21 days                                                                             |                                                                                                                        |                                                                                                                                                                                                                                                                                                                                                                                                                          |   |            |   |            |   |          |   |           |   |           |   |            |   |            |   |          |   |          |    |        |
| 7  | Unsure                                                                                 |                                                                                                                        |                                                                                                                                                                                                                                                                                                                                                                                                                          |   |            |   |            |   |          |   |           |   |           |   |            |   |            |   |          |   |          |    |        |
| 80 | [dwd_legal_length_2]                                                                   | What should the prognosis be for patients with a terminal illness to be eligible to participate in Death with Dignity? | radio <table><tr><td>1</td><td>None</td></tr><tr><td>2</td><td>&lt; 72 hours</td></tr><tr><td>3</td><td>&lt; 7 days</td></tr><tr><td>4</td><td>&lt; 14 days</td></tr><tr><td>5</td><td>&lt; 1 month</td></tr><tr><td>6</td><td>&lt; 3 months</td></tr><tr><td>7</td><td>&lt; 6 months</td></tr><tr><td>8</td><td>&lt; 1 year</td></tr><tr><td>9</td><td>&gt; 1 year</td></tr><tr><td>10</td><td>Unsure</td></tr></table> | 1 | None       | 2 | < 72 hours | 3 | < 7 days | 4 | < 14 days | 5 | < 1 month | 6 | < 3 months | 7 | < 6 months | 8 | < 1 year | 9 | > 1 year | 10 | Unsure |
| 1  | None                                                                                   |                                                                                                                        |                                                                                                                                                                                                                                                                                                                                                                                                                          |   |            |   |            |   |          |   |           |   |           |   |            |   |            |   |          |   |          |    |        |
| 2  | < 72 hours                                                                             |                                                                                                                        |                                                                                                                                                                                                                                                                                                                                                                                                                          |   |            |   |            |   |          |   |           |   |           |   |            |   |            |   |          |   |          |    |        |
| 3  | < 7 days                                                                               |                                                                                                                        |                                                                                                                                                                                                                                                                                                                                                                                                                          |   |            |   |            |   |          |   |           |   |           |   |            |   |            |   |          |   |          |    |        |
| 4  | < 14 days                                                                              |                                                                                                                        |                                                                                                                                                                                                                                                                                                                                                                                                                          |   |            |   |            |   |          |   |           |   |           |   |            |   |            |   |          |   |          |    |        |
| 5  | < 1 month                                                                              |                                                                                                                        |                                                                                                                                                                                                                                                                                                                                                                                                                          |   |            |   |            |   |          |   |           |   |           |   |            |   |            |   |          |   |          |    |        |
| 6  | < 3 months                                                                             |                                                                                                                        |                                                                                                                                                                                                                                                                                                                                                                                                                          |   |            |   |            |   |          |   |           |   |           |   |            |   |            |   |          |   |          |    |        |
| 7  | < 6 months                                                                             |                                                                                                                        |                                                                                                                                                                                                                                                                                                                                                                                                                          |   |            |   |            |   |          |   |           |   |           |   |            |   |            |   |          |   |          |    |        |
| 8  | < 1 year                                                                               |                                                                                                                        |                                                                                                                                                                                                                                                                                                                                                                                                                          |   |            |   |            |   |          |   |           |   |           |   |            |   |            |   |          |   |          |    |        |
| 9  | > 1 year                                                                               |                                                                                                                        |                                                                                                                                                                                                                                                                                                                                                                                                                          |   |            |   |            |   |          |   |           |   |           |   |            |   |            |   |          |   |          |    |        |
| 10 | Unsure                                                                                 |                                                                                                                        |                                                                                                                                                                                                                                                                                                                                                                                                                          |   |            |   |            |   |          |   |           |   |           |   |            |   |            |   |          |   |          |    |        |
| 81 | [interview_yesno]<br>Show the field ONLY if:<br>[dwd_aware] = '1' OR [dwd_aware] = '2' | Would you be willing to participate in an interview or a focus group on Death with Dignity?                            | yesno <table><tr><td>1</td><td>Yes</td></tr><tr><td>0</td><td>No</td></tr></table>                                                                                                                                                                                                                                                                                                                                       | 1 | Yes        | 0 | No         |   |          |   |           |   |           |   |            |   |            |   |          |   |          |    |        |
| 1  | Yes                                                                                    |                                                                                                                        |                                                                                                                                                                                                                                                                                                                                                                                                                          |   |            |   |            |   |          |   |           |   |           |   |            |   |            |   |          |   |          |    |        |
| 0  | No                                                                                     |                                                                                                                        |                                                                                                                                                                                                                                                                                                                                                                                                                          |   |            |   |            |   |          |   |           |   |           |   |            |   |            |   |          |   |          |    |        |
| 82 | [consenting]                                                                           | Could we contact you in the future about other studies related to this topic?                                          | yesno <table><tr><td>1</td><td>Yes</td></tr><tr><td>0</td><td>No</td></tr></table>                                                                                                                                                                                                                                                                                                                                       | 1 | Yes        | 0 | No         |   |          |   |           |   |           |   |            |   |            |   |          |   |          |    |        |
| 1  | Yes                                                                                    |                                                                                                                        |                                                                                                                                                                                                                                                                                                                                                                                                                          |   |            |   |            |   |          |   |           |   |           |   |            |   |            |   |          |   |          |    |        |
| 0  | No                                                                                     |                                                                                                                        |                                                                                                                                                                                                                                                                                                                                                                                                                          |   |            |   |            |   |          |   |           |   |           |   |            |   |            |   |          |   |          |    |        |
| 83 | [healthcare_complete]                                                                  | Section Header: <i>Form Status</i><br>Complete?                                                                        | dropdown <table><tr><td>0</td><td>Incomplete</td></tr><tr><td>1</td><td>Unverified</td></tr><tr><td>2</td><td>Complete</td></tr></table>                                                                                                                                                                                                                                                                                 | 0 | Incomplete | 1 | Unverified | 2 | Complete |   |           |   |           |   |            |   |            |   |          |   |          |    |        |
| 0  | Incomplete                                                                             |                                                                                                                        |                                                                                                                                                                                                                                                                                                                                                                                                                          |   |            |   |            |   |          |   |           |   |           |   |            |   |            |   |          |   |          |    |        |
| 1  | Unverified                                                                             |                                                                                                                        |                                                                                                                                                                                                                                                                                                                                                                                                                          |   |            |   |            |   |          |   |           |   |           |   |            |   |            |   |          |   |          |    |        |
| 2  | Complete                                                                               |                                                                                                                        |                                                                                                                                                                                                                                                                                                                                                                                                                          |   |            |   |            |   |          |   |           |   |           |   |            |   |            |   |          |   |          |    |        |
